# Supplementary material for: Men care too: a qualitative study examining women’s perceptions of fathers’ engagement in early childhood development (ECD) during an ECD program for HIV-positive mothers in Malawi
Source: PubMed Central journal article supplement — BMJ Open. 2022 Jul 14;12(7):e056976. doi: 10.1136/bmjopen-2021-056976 (PMC9295663; doi:10.1136/bmjopen-2021-056976), 2022-07-14
Supplement: bmjopen-2021-056976.draft_revisions.pdf [file bmjopen-2021-056976.draft_revisions.pdf]

# BMJ Open

BMJ Open is committed to open peer review. As part of this commitment we make the peer review history of every article we publish publicly available.

When an article is published we post the peer reviewers' comments and the authors' responses online. We also post the versions of the paper that were used during peer review. These are the versions that the peer review comments apply to.

The versions of the paper that follow are the versions that were submitted during the peer review process. They are not the versions of record or the final published versions. They should not be cited or distributed as the published version of this manuscript.

BMJ Open is an open access journal and the full, final, typeset and author-corrected version of record of the manuscript is available on our site with no access controls, subscription charges or pay-per-view fees (<http://bmjopen.bmj.com>).

If you have any questions on BMJ Open's open peer review process please email [info.bmjopen@bmj.com](mailto:info.bmjopen@bmj.com)

# BMJ Open

## Men care too: a qualitative study examining women's perceptions of fathers' engagement in early childhood development (ECD) during an ECD program for HIV-positive mothers in Malawi

|                               |                                                                                                                                                                                                                                                                                                                                                                                                                                                                                                                                                                                                                                                                                                                                                                                                                                                                                                                                                                                                                                                                                                                                                                                                                                        |
|-------------------------------|----------------------------------------------------------------------------------------------------------------------------------------------------------------------------------------------------------------------------------------------------------------------------------------------------------------------------------------------------------------------------------------------------------------------------------------------------------------------------------------------------------------------------------------------------------------------------------------------------------------------------------------------------------------------------------------------------------------------------------------------------------------------------------------------------------------------------------------------------------------------------------------------------------------------------------------------------------------------------------------------------------------------------------------------------------------------------------------------------------------------------------------------------------------------------------------------------------------------------------------|
| Journal:                      | <i>BMJ Open</i>                                                                                                                                                                                                                                                                                                                                                                                                                                                                                                                                                                                                                                                                                                                                                                                                                                                                                                                                                                                                                                                                                                                                                                                                                        |
| Manuscript ID                 | bmjopen-2021-056976                                                                                                                                                                                                                                                                                                                                                                                                                                                                                                                                                                                                                                                                                                                                                                                                                                                                                                                                                                                                                                                                                                                                                                                                                    |
| Article Type:                 | Original research                                                                                                                                                                                                                                                                                                                                                                                                                                                                                                                                                                                                                                                                                                                                                                                                                                                                                                                                                                                                                                                                                                                                                                                                                      |
| Date Submitted by the Author: | 17-Sep-2021                                                                                                                                                                                                                                                                                                                                                                                                                                                                                                                                                                                                                                                                                                                                                                                                                                                                                                                                                                                                                                                                                                                                                                                                                            |
| Complete List of Authors:     | <p>Temelkovska, Tijana; University of California Los Angeles<br/>           Kalande, Pericles ; Partners in Hope Medical Center, Implementation Science Department<br/>           Udedi, Evelyn ; Partners in Hope Medical Center, Implementation Science Department<br/>           Bruns, Laurie; University of California Los Angeles, Global Health Institute<br/>           Mulungu, Siyenunu; Partners in Hope Medical Center, Implementation Science Department<br/>           Hubbard, Julie; University of California Los Angeles, Division of Infectious Diseases ; Partners in Hope Medical Center, Implementation Science Department<br/>           Gupta, Sundeep; University of California Los Angeles, Division of Infectious Diseases; Partners in Hope Medical Center<br/>           Richter, Linda; University of the Witwatersrand, Centre of Excellence in Human Development<br/>           Coates, Thomas; University of California Los Angeles, Division of Infectious Diseases; University of California Global Health Institute<br/>           Dovel , Kathryn ; University of California Los Angeles, Division of Infectious Diseases ; Partners in Hope Medical Center, Implementation Science Department</p> |
| Keywords:                     | QUALITATIVE RESEARCH, Community child health < PAEDIATRICS, HIV & AIDS < INFECTIOUS DISEASES                                                                                                                                                                                                                                                                                                                                                                                                                                                                                                                                                                                                                                                                                                                                                                                                                                                                                                                                                                                                                                                                                                                                           |
|                               |                                                                                                                                                                                                                                                                                                                                                                                                                                                                                                                                                                                                                                                                                                                                                                                                                                                                                                                                                                                                                                                                                                                                                                                                                                        |

SCHOLARONE™  
Manuscripts

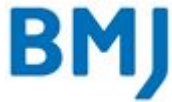

I, the Submitting Author has the right to grant and does grant on behalf of all authors of the Work (as defined in the below author licence), an exclusive licence and/or a non-exclusive licence for contributions from authors who are: i) UK Crown employees; ii) where BMJ has agreed a CC-BY licence shall apply, and/or iii) in accordance with the terms applicable for US Federal Government officers or employees acting as part of their official duties; on a worldwide, perpetual, irrevocable, royalty-free basis to BMJ Publishing Group Ltd ("BMJ") its licensees and where the relevant Journal is co-owned by BMJ to the co-owners of the Journal, to publish the Work in this journal and any other BMJ products and to exploit all rights, as set out in our [licence](#).

The Submitting Author accepts and understands that any supply made under these terms is made by BMJ to the Submitting Author unless you are acting as an employee on behalf of your employer or a postgraduate student of an affiliated institution which is paying any applicable article publishing charge ("APC") for Open Access articles. Where the Submitting Author wishes to make the Work available on an Open Access basis (and intends to pay the relevant APC), the terms of reuse of such Open Access shall be governed by a Creative Commons licence – details of these licences and which [Creative Commons](#) licence will apply to this Work are set out in our licence referred to above.

Other than as permitted in any relevant BMJ Author's Self Archiving Policies, I confirm this Work has not been accepted for publication elsewhere, is not being considered for publication elsewhere and does not duplicate material already published. I confirm all authors consent to publication of this Work and authorise the granting of this licence.

1  
2  
3  
4  
5  
6 Men care too: a qualitative study examining women's perceptions of fathers' engagement in  
7 early childhood development (ECD) during an ECD program for HIV-positive mothers in  
8 Malawi  
9

10  
11 T. Temelkowska<sup>1</sup>, P C Kalande<sup>2</sup>, E Udedi<sup>2</sup>, L Bruns<sup>3,4</sup>, S Mulungu<sup>2</sup>, J Hubbard<sup>3</sup>, S Gupta<sup>2,3</sup>, L  
12 Richter<sup>5</sup>, T Coates<sup>3,4</sup>, K Dovel<sup>2,3</sup>  
13  
14

- 15 1. David Geffen School of Medicine, University of California Los Angeles, United States
- 16 2. Partners in Hope, Lilongwe, Malawi
- 17 3. Division of Infectious Diseases, David Geffen School of Medicine, University of  
18 California Los Angeles, United States
- 19 4. University of California Global Health Institute, United States
- 20 5. DSI-NRF Centre of Excellence in Human Development, University of the  
21 Witwatersrand, Johannesburg, South Africa  
22  
23  
24

25 Corresponding author:  
26 [temelkowska@mednet.ucla.edu](mailto:temelkowska@mednet.ucla.edu) (TT)  
27  
28  
29  
30  
31  
32  
33  
34  
35  
36  
37  
38  
39  
40  
41  
42  
43  
44  
45  
46  
47  
48  
49  
50  
51  
52  
53  
54  
55  
56  
57  
58  
59  
60

## Abstract

### *Background*

Early childhood development (ECD) interventions improve developmental outcomes and parental support for children affected by HIV. Integration with prevention of mother to child transmission (PMTCT) strategies can benefit both mother and child wellbeing. However, PMTCT and ECD programs rarely target fathers, despite research showing that father involvement improves maternal and child outcomes. More research is needed to understand the acceptability of integrated ECD programs among men.

### *Methods*

We implemented an integrated PMTCT-ECD intervention in six Malawi health facilities for HIV-positive mothers and their infants (ages 1.5-24 months). The intervention provided ECD education and counseling sessions during routine PMTCT visits, following WHO/UNICEF Care for Child Development curriculum. We conducted in-depth interviews with 29 mothers enrolled in the intervention for  $\geq 6$  months regarding their perception of father buy-in and engagement in ECD activities and the PMTCT-ECD program. Data were coded using inductive and deductive strategies and analyzed using constant comparison methods in Atlas.ti v1.6.

### *Results*

Almost all mothers reported discussing the PMTCT-ECD intervention and lessons learned with their male partners. Most mothers reported that partners viewed ECD as beneficial and practiced ECD activities at home. Several reported improved partner relationships and increased communication due to the intervention. Nearly all believed their partners saw ECD and ECD sessions as important and valuable to their family. However, most mothers believed fathers would not attend the intervention due to concerns regarding HIV-related stigma at PMTCT centers, time required to attend, and perceptions that the intervention was intended only for women.

### *Conclusions*

We found that fathers were interested in the PMTCT-ECD program and actively practiced ECD behaviors at home. However, fathers did not attend the program and felt uncomfortable visiting PMTCT centers. PMTCT-ECD interventions should consider direct outreach in communities or implementing ECD sessions at facility entry points where men frequent, such as outpatient departments.

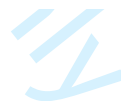

## Article summary

### *Strengths and limitations of this study*

- Reaching fathers in Sub-Saharan Africa with ECD strategies may improve child developmental outcomes, as well as family engagement with health services. This may be particularly true for children affected by HIV, who are more vulnerable to poor health and developmental outcomes.
- Men are rarely included in early childhood development (ECD) programs. Given this gap, we explored the role of an ECD program on men's interest in, engagement in, and unmet needs regarding ECD activities in Malawi. We focus on the male partners of women living with HIV who were enrolled in an integrated prevention-of-mother-to-child-transmission (PMTCT) and ECD program for a minimum of 6 months.
- The study design and research question were based on strong conceptual framework from existing literature regarding male caregiver involvement in maternal/ child health programs and in children's lives.
- This study is limited by its reliance on mothers' perceptions of their male partners attitudes and engagement in ECD activities.

## Introduction

Throughout sub-Saharan Africa, national HIV programs are transitioning from acute services to long-term, chronic care for those infected and affected by HIV. As countries transition, holistic, integrated health services are being prioritized. Prevention of mother-to-child transmission (PMTCT) services can especially benefit from a holistic approach. Across the region approximately 90-95% of HIV positive pregnant women are on antiretroviral therapy (ART) and child infections have dropped significantly – now is the time to promote holistic mother and child services, which can benefit PMTCT retention and mothers' and children's general well-being [1,2].

Early Childhood Development (ECD) interventions represent one strategy to promote mothers' PMTCT retention and mother and child wellbeing. ECD programs are associated with improved physical, psychosocial, and cognitive skills in children [3]. Since HIV-exposed uninfected children are at higher risk of mortality and delayed development than HIV-unexposed children, there is an opportunity to reach some of the most vulnerable children with ECD. An integrated program may also encourage PMTCT retention by improving the PMTCT visit experience for women and offering another motivation for clinic attendance [4]. However, both PMTCT and ECD programs tend to focus on women and fail to engage male partners [5]. The lack of male engagement threatens the potential impact of both PMTCT and ECD strategies. Further, there are increasing calls for increased entry points for men to be engaged with health facilities. Excluding men from ECD programs misses key opportunities to engage men as caregivers, and eventually as clients.

When men attend PMTCT programs, there is decreased risk of infant HIV infection and mortality [6]. Male involvement in PMTCT during pregnancy and after birth has been linked to improved maternal health behaviors, increased use of maternal and newborn health services, and is predictive of long-term involvement of fathers in their children's lives [7]. A review of 18 studies assessing male involvement in reproductive health interventions in sub-Saharan Africa found that male involvement was consistently associated with improved reproductive health outcomes and greater spousal communication [8]. With regard to ECD and child wellbeing, increased male caregiver involvement is associated with improved cognitive development, increased social responsiveness and greater school achievement among children [9,10].

However, many obstacles limit male caregiver involvement in both PMTCT and ECD programs. Antenatal care (ANC) services and related PMTCT programs are often not designed to include men [5]. Healthcare providers, who are accustomed to speaking to women, report feeling uncomfortable talking about PMTCT or ECD with men [10]. This likely contributes to men's perception of PMTCT and under-five clinics as 'female spaces' and not 'male-friendly' [5]. Other barriers to men's PMTCT engagement include men's time constraints due to employment, lack of knowledge about PMTCT strategies and the importance of men as caregivers, and harmful gender norms that discourage open communication and joint decision making among couples [5,11,12]. Similar barriers likely also affect men's involvement in ECD programs, although very little research has examined men's engagement in ECD programs [13]. In order to develop successful, holistic PMTCT services, more research is needed to explore how to design and implement integrated PMTCT and ECD strategies that effectively engage men.

1  
2  
3  
4 We conducted in-depth interviews with women enrolled in an integrated PMTCT-ECD program  
5 that optimized clinic wait times to deliver ECD and responsive caregiving lessons to PMTCT  
6 clients while they waited to receive routine ART services. Though this program was not targeted  
7 to men, we hypothesized that mothers' participation had indirect effects on male caregivers and  
8 family dynamics. We investigated participating mother's perceptions regarding fathers' buy-in to  
9 the integrated PMTCT-ECD program, level of involvement in ECD activities with their children  
10 at home, and any indirect effects the program had on couple dynamics and communication. We  
11 also explored perceived barriers to male caregiver involvement in the PMTCT-ECD program, as  
12 well as mothers' recommendations to facilitate greater male engagement.  
13  
14

## 15 **Methods**

### 16 ***The Intervention***

17 We conducted an integrated PMTCT-ECD intervention for HIV-positive mothers and their  
18 young children (aged 1.5-24 months) in six health facilities in central Malawi. Facilities varied in  
19 size, type (district hospital, mission hospital, health center), and district. Mothers who were HIV-  
20 positive, enrolled in PMTCT programs at participating facilities, and whose youngest child was  
21 <8 weeks of age were recruited to participate in the integrated PMTCT-ECD program. Enrolled  
22 mothers received an interactive ECD skills development session during every PMTCT visit  
23 (every 1-3 months, depending on mothers' time since ART initiation and ART adherence  
24 measures) until they graduated from the PMTCT program when their child reached 24 months of  
25 age. Mothers could also access ECD sessions anytime they attended a facility, whether for  
26 PMTCT or not. ECD sessions were offered while mothers waited for routine health services, so  
27 participation did not require additional time or resources from the mothers.  
28  
29  
30  
31

32 ECD sessions followed the WHO-UNICEF 'Care for Child Development' package that  
33 sensitizes mothers to the developing cognitive, emotional and communication needs of their  
34 infants, and reinforces caregiving sensitivity and responsiveness through support and simple play  
35 activities [14]. Mothers are trained through interactive lessons, play, and demonstrated scenarios  
36 to talk and sing with infants at an early age, make eye contact, mimic infant vocalizations, and  
37 recognize and respond to their infant's developmental milestones. All sessions were  
38 implemented by trained ECD counselors who were 'Expert Clients', a Malawi cadre of HIV-  
39 positive community members who volunteer for a small monthly stipend to provide HIV  
40 counseling and support to infected individuals [15].  
41  
42

### 43 ***Data Collection***

44 In-depth interviews were conducted from June to July 2019 with a random subset of 29 mothers  
45 enrolled in the PMTCT-ECD program across four implementing facilities for  $\geq 6$  months.  
46 Interview guides and the analysis framework were developed to assess mothers' ECD  
47 knowledge, practice and male caregiver involvement in ECD. Guides were piloted amongst three  
48 women to ensure comprehensibility and refined based on feedback. Interviews were conducted  
49 in the local language (Chichewa) in private spaces in the health facilities and ranged in duration  
50 from 30-50 minutes. Women were compensated 4000 Malawi Kwacha (approximately US \$5)  
51 for their transportation costs to attend the interview.  
52  
53

### 54 ***Data analysis***



Audio recordings were translated and transcribed to English for analysis. For this paper, we only include interviews with women who report that the father of their youngest child was present in the child's daily life (since absent fathers will not be exposed to ECD sessions nor will they have a chance to practice ECD activities with the child). A preliminary codebook was generated using deductive coding from existing literature and inductive coding from pilot interviews. Two investigators (TT and PK) coded the same five transcripts separately using Atlas.ti, compared codes, and resolved differences. An additional two transcripts were simultaneously coded with similar codes between investigators. The final codebook was used by the same two investigators to code all remaining transcripts. Data were analyzed using constant comparison methods. Below we present dominant themes related to male engagement and fathers' understanding and interest in PMTCT-ECD programs.

### ***Patient and Public Involvement***

Patients or the public were not involved in the design, conduct, reporting, or dissemination plans of our research.

### ***Ethical Approval***

Ethical approval was attained from the University of California Los Angeles IRB (ID# 20-003525) and the Malawi institutional review board, National Health Sciences Review Committee (ID# 19/03/2429).

### **Results**

A total of 29 mothers were interviewed. Twenty-two mothers (76%) reported that the father of their youngest child was present in the child's life and were included in this analysis. Mothers had a mean age of 30 years, a median of 4 children, and only one woman had no education (Table 1). All mothers self-reported attending the majority of ECD sessions. Half of these mothers reported that fathers spent time with their youngest child on a daily basis, and only one mother reported that the father spent time with the child once per week or less. All but one mother reported that they communicated with the father about the ECD program. Almost all mothers reported that the fathers' primary responsibility was to provide financially for their children, but that fathers also played with children and looked after children when mothers were busy.

| <b>Table 1. Respondent demographic characteristics</b> |                                |
|--------------------------------------------------------|--------------------------------|
|                                                        | <b>Participants<br/>(n=22)</b> |
|                                                        | 30 (21-42)                     |
| Age, mean (range)                                      |                                |
| Married, No. (%)                                       | 20 (91)                        |
| Number of children, median (range)                     | 4 (1-8)                        |
| Household primary income, No. (%)                      |                                |
| Formal employment                                      | 0                              |

|                                               |          |
|-----------------------------------------------|----------|
| Informal employment                           | 22 (100) |
| Not working                                   | 0        |
| Education, No. (%)                            |          |
| No education                                  | 1 (5)    |
| Primary                                       | 10 (45)  |
| Secondary or higher                           | 11 (50)  |
| Male partner involvement                      |          |
| With infant every day                         | 11 (50)  |
| With infant several days a week               | 10 (45)  |
| With infant <1 days a week                    | 1 (5)    |
| Discussed PMTCT-ECD program with male partner | 21 (96)  |
| ECD session attendance                        |          |
| Attend most sessions                          | 22 (100) |
| Attend a few sessions                         | 0        |
| Dropped out of program                        | 0        |

### ***Fathers valued ECD and increased their engagement with their youngest child***

Most mothers reported that fathers had positive opinions towards the ECD program, reporting that male partners noticed the progress in their youngest child because of new ECD practices. In families with older children, mothers reported that their partners recognized differences between the youngest child and older siblings who were raised without the ECD program.

*[My husband] plays with the child and he has seen a change, he asks me why the child is different from the others and I tell him that we learn ECD at the hospital and they teach us about the child's behavior. – Mother of 8, age 31*

Most mothers reported that their partners supported and actively implemented ECD practices at home. Mothers directly shared ECD lessons learned from the intervention with their partner, and these lessons were put into practice by both parents.

*[My husband] was wondering why I was so fond of making things like balls and toy cars, and when he asked, I explained to him about [what I learned at] the ECD program. Now he helps me with making toys for the kid. – Mother of 7, age 34*

*After I told my husband about ECD, he is active with the child; he makes him porridge, sings to him, and plays with him – Mother of 2, age 21*

Mothers believed that male partners were motivated to practice ECD behavior with their children because their child gave immediate positive response to stimulation and because fathers understood the long-term benefit of ECD practices.

*ECD taught me about singing and playing with the child, and when the father of the child does this [singing and playing] and sees how the child is responding, he sees how important the ECD sessions are. – Mother of 3, age 20*

1  
2  
3  
4 ***Family relationships were strengthened as a result of increased communication and ECD***  
5 ***knowledge sharing***

6 Several mothers reported that since the ECD program started, their male partners and youngest  
7 children have developed a closer, more intimate bond, reportedly due to increases in ECD  
8 knowledge and practices.  
9

10  
11 *The bond has increased between [the father and the child] and I am able to leave the*  
12 *child with him and he is able to take care of the child. – Mother of 5, age 37*  
13

14 Nearly all reported increases in communication, which often resulted in better teamwork and  
15 understanding between the couple. Over half of mothers reported improved relationships with  
16 their male partners since starting the ECD program. Frequently cited examples included sharing  
17 more responsibilities at home (improved equity), having a common goal regarding their children  
18 and childcare, encouragement and support of one another for individual and joint goals, and even  
19 living with less conflict due to increased communication and a sense of purpose for childrearing.  
20  
21

22  
23 *Me and my husband are living in harmony because we are raising this child together.*  
24 *The father of the child has just realized that the responsibility is for the both of us. –*  
25 *Mother of 5, age 37*  
26

27 *Because of the program, even when we are fighting, the issues that have to do with the*  
28 *child bring us together so that we even laugh together and forget the fight. – Mother of 4,*  
29 *age 31*  
30

31  
32 ***Remaining barriers to male partner attendance of the PMTCT-ECD program***

33 Only a few mothers believed that their partner would feel comfortable attending the PMTCT-  
34 ECD program, citing examples of their partners' active interest in the ECD sessions. However,  
35 only one mother reported that her partner routinely attended the PMTCT-ECD program. Some  
36 women believed that men in their community who attended antenatal visits to support their wives  
37 might also feel comfortable attending the ECD program, but men who were not comfortable  
38 attending antenatal or PMTCT visits would not attend ECD.  
39  
40

41 *I see [my husband's] interest from the way he reacts and asks questions to follow what*  
42 *we have learnt at the ECD program, so I think he might come [to the program]. – Mother*  
43 *of 7, age 34*  
44

45  
46 Most mothers believed that their partners would be unwilling to attend ECD sessions at the  
47 clinic, particularly because the PMTCT-ECD program was organized around PMTCT services.  
48 Several mothers stated that men would not feel comfortable being at PMTCT clinics due to  
49 stigma and concerns about being pressured to test for HIV while attending ECD sessions.  
50

51 *Many fathers think that [health workers] will be talking to them in public and they will be*  
52 *embarrassed. I think the big problem for men is being shy. – Mother of 6, age 31*  
53  
54  
55  
56  
57  
58  
59

1  
2  
3 Other mothers reported that their partners believed that ECD sessions were only for women and  
4 would not attend but desired to hear about ECD through the female partner. These men still  
5 practiced ECD activities at home, but believed that men were not meant to attend the PMTCT-  
6 ECD intervention.  
7

8  
9 *Some men will not come because they might say that the program is meant for women not*  
10 *men. – Mother of 4, age 31*  
11

12 Even if men felt comfortable coming to the clinic, many mothers identified other barriers to  
13 participation. A majority of mothers reported that the time required to travel to the clinic and  
14 wait for services was a significant barrier – most men would not sacrifice income-generating  
15 activities to attend an ECD session.  
16

17  
18 *Men will not come [to ECD sessions] because when we come here we play with the kids*  
19 *and he may consider that as wasting time; he would rather do other helpful things. –*  
20 *Mother of 3, age 31*  
21

### 22 ***Additional strategies to engage men in ECD programs***

23 Almost all mothers believed that male caregiver engagement in ECD could be increased through  
24 raising awareness and educating men about the importance of PMTCT-ECD activities for  
25 children. Most suggested that the program needed to actively invite fathers to attend in order to  
26 demonstrate that male caregivers are welcome and encouraged to participate in PMTCT-ECD.  
27 Several mothers also believed that men would be more comfortable with male-only sessions.  
28

29  
30  
31 *[Health workers] should make an effort to explain that both fathers and mothers are*  
32 *important in ECD. They should help us explain [to male partners] that this is not a place*  
33 *to force people to test blood [for HIV] but to know our responsibility as a father and*  
34 *mother in caring for children. – Mother of 6, age 31*  
35

36  
37 *There is a need to invite the fathers as well. Tell the mothers to come with their husbands*  
38 *so that the fathers should also be able to listen about ECD ... We should be able to bring*  
39 *the husbands to the ECD so that we listen to the counseling together. – Mother of 2, age*  
40 *26*  
41

42 However, the majority mothers believed that men could best be reached outside the clinic. Most  
43 suggested sending illustrated, informational pamphlets home with women after each PMTCT-  
44 ECD visit to increase male engagement and awareness regarding ECD practices.  
45

46  
47 *Men are busy, even sometimes when they can't come for an [ART] refill here we get*  
48 *drugs for them because they are so busy, but if they can read [the pamphlet] then they*  
49 *will know what they are supposed to do. – Mother of 4, age 34*  
50

51 Some mothers also suggested directly engaging men in the community to explain ECD through  
52 phone calls or home visits to male partners of mothers in the ECD program, or larger community  
53 meetings that incorporate all fathers within the community.  
54  
55  
56  
57  
58  
59

1  
2  
3 *Men should be sensitized to the importance of the program and also the need for the*  
4 *participation of everyone. – Mother of 4, age 31*  
5

6  
7 *A woman should encourage her husband about the advantages of the ECD program and*  
8 *also the counselors should be visiting them in their homes and encouraging them to be*  
9 *coming to the sessions... If a man comes to get his drugs [ART] as well, he should be*  
10 *encouraged to participate [in the ECD program]. The other way is to make phone calls*  
11 *to them and remind them about the meetings. – Mother of 5, age 34*  
12

13 Finally, a few mothers suggested that ECD sessions should be integrated as part of normal clinic  
14 activities of men. For example, at outpatient or sexually transmitted infection (STI) departments  
15 where men frequent.  
16

17  
18 *When [men] come to get drugs on their own, they should be briefed about ECD so the*  
19 *men who have children can get that information. – Mother of 4, age 34*  
20  
21

## 22 **Discussion**

23 Fathers play a critical role in child development and mothers' engagement in PMTCT strategies.  
24 We explored fathers' perception of an integrated PMTCT-ECD intervention that targeted  
25 mothers living with HIV in Malawi, including barriers to men's involvement, and  
26 recommendations for engaging men in ECD interventions in the future. We relied on secondary  
27 reports from mothers participating in the PMTCT-ECD program since they are most familiar  
28 with both intervention activities, and the fathers' perception of these activities. We found that  
29 nearly all mothers discussed ECD lessons with their male partners (fathers) frequently. Within a  
30 PMTCT-ECD intervention that was not specifically targeted to men, most fathers were perceived  
31 to have high levels of buy-in for the ECD intervention, accept ECD messaging, and actively  
32 practice ECD activities at home with their children. The PMTCT-ECD intervention increased  
33 couple communication within some relationships by providing the mother and father with a joint  
34 goal around ECD for their family. due to the intervention. However, most mothers believed that  
35 fathers would not attend the intervention due to concerns regarding HIV-related stigma at  
36 PMTCT centers, time required to attend, and perceptions that the intervention was intended only  
37 for women.  
38  
39  
40  
41

42 Mothers believed that fathers were interested in gaining greater ECD skills and actively involved  
43 in actively involved in ECD activities at home. This supports other studies in South Africa  
44 reporting that many men are interested in education and counseling to prepare for fatherhood  
45 [12]. Our findings contradict literature that suggests that cultural perceptions regarding gender  
46 norms continue to be a major barrier to fathers' engagement in ECD and responsive childcare [9]  
47 – we find that fathers are, as reported by their female partners, largely seen as engaged and active  
48 parents. Future parenting and ECD programs should actively include and target fathers, who  
49 have been shown to support antenatal care and PMTCT, prioritize preparing for fatherhood, and  
50 may have a deep interest in learning responsive caregiving techniques [5,12,16].  
51  
52

53  
54 Most mothers reported that fathers engagement in caregiving increased as a result of ECD  
55 knowledge gained from mothers' participation in the PMTCT-ECD program. As a result, some  
56  
57  
58  
59

1  
2  
3 women believed that family relationships were strengthened due to increased couple  
4 communication and sharing of caregiver responsibilities between mother and father. These  
5 findings are consistent with a study in Tanzania and Zimbabwe that found that interventions  
6 aimed to increase male involvement in maternal and child health activities improved  
7 relationships and positive emotional outcomes among many couples, which further encouraged  
8 men's engagement as caregivers [17]. Other studies highlight the role of male partner  
9 engagement in providing additional social support to mothers, which can further improve ECD  
10 outcomes [18,19]. Though not examined in our analysis, these positive effects on families may  
11 translate to secondary benefits as well. Other studies from the region have found associations  
12 between male partner involvement in PMTCT and subsequent health outcomes of both mothers  
13 and children including decreased risk of HIV transmission, decreased risk of child mortality, and  
14 increased maternal adherence to ART [19, 20]. These findings support the need to tailor  
15 programs such as PMTCT-ECD interventions for both parents and welcome fathers into these  
16 spaces in order to increase ECD knowledge and awareness among men and strengthen PMTCT  
17 through an integrated, holistic approach.  
18  
19  
20

21  
22 Despite fathers' support for and value of ECD sessions, mothers believed most men were  
23 uncomfortable attending the current PMTCT-ECD program. This finding is supported by other  
24 studies in sub-Saharan Africa that have found that while many men are interested in participating  
25 in maternal and child health interventions, actual male attendance rates remain low [8,21]. Most  
26 mothers in our study believed male partners were uncomfortable attending these sessions  
27 because they were held at the ART clinic where men assumed they would be pressured or forced  
28 to test for HIV. Some mothers also reported that men believed the ECD sessions, and PMTCT  
29 services more broadly, were not meant for fathers. Our findings corroborate previous literature.  
30 In their systematic review of barriers and facilitators of male partner involvement in PMTCT,  
31 Morfaw et al. also found the most salient barrier to male engagement was men's perception that  
32 PMTCT and antenatal clinics were 'women's spaces', revealing that men need to be actively  
33 welcomed into facility spaces if perceptions of female-centered services are to be overcome [22].  
34  
35

36  
37 To address these barriers to male involvement, the majority of mothers recommended using  
38 direct outreach targeting men in order to increase awareness about the importance of ECD and  
39 joint parenting. Some mothers also recommended actively inviting men to the current PMTCT-  
40 ECD program or providing ECD sessions at health facility services where men frequent (such as  
41 general outpatient services). A range of community-based approaches throughout the region have  
42 shown promising results in disseminating important maternal and child-related health  
43 information. These include home visits to HIV-positive mothers and their partners by male  
44 community 'role models' and male health workers, and community dissemination via radio or  
45 community spaces frequented by men including football events, markets, and churches [23–25].  
46 In Malawi specifically, community leaders or 'chiefs' can provide the leadership necessary to  
47 encourage and normalize male engagement in maternal and child health interventions at the  
48 community level [21]. One recent meta-analysis found that community education interventions  
49 had the greatest impact, more than clinic invitation letters, facility-based interventions and verbal  
50 encouragement [26]. However, community-based outreach is expensive and time consuming,  
51 and may limit programs' scalability. Regardless, future integrated PMTCT programs should  
52 consider utilizing community services or restructuring facility spaces to directly engage men.  
53  
54  
55  
56  
57  
58  
59

### ***Limitations***

This study has several limitations that should be noted. First, we rely on mothers' perceptions of their male partners – we do not have direct feedback from men themselves. Women participating in the study may have incomplete or skewed perceptions of their partners perceptions of and barriers to ECD sessions. Additional research is needed that directly engages fathers to further understand their perceptions of integrated PMTCT-ECD services, and how to engage them in these strategies. Second, the study is limited to mothers in central Malawi and may not be representative of other settings. However, our findings are similar to those found throughout the region, suggesting some comparability with other settings. Third, our data rely on mothers who were active in the PMTCT-ECD program for a minimum of 6 months. Future analyses should examine male engagement at the end of the program as fathers may show increased engagement over time.

### **Conclusion**

Most mothers enrolled in a PMTCT-ECD program in Malawi believed fathers saw value in the PMTCT-ECD program, demonstrated interest in gaining ECD knowledge, and actively implemented ECD activities at home. Despite not having direct engagement with this PMTCT-ECD program, male caregivers still received ECD messaging and began to prioritize ECD activities at home, suggesting that men might be easily reached if programs were designed to include them. Although mothers reported increased interest in ECD among men, integrating PMTCT and ECD services alone was not enough to change perceptions that PMTCT is a women's space. The structure of PMTCT strategies should be revised if men are to be engaged. In addition, ECD strategies could be implemented in locations where men frequent (community or outpatient departments) in order to directly engage men in ECD program activities.

### **Acknowledgements**

The authors gratefully acknowledge the Partners in Hope team in Malawi, the program staff who implemented the intervention, the mothers who participate in the intervention and the research staff who collected study data.

### **Author contributions**

TC and LR led the parent PMTCT-ECD trial design, with involvement from LB and EU. KD and TT conceptualized the study as it pertained to male caregivers. TT, PK, CM and SM lead study implementation and data collection with support from SG. TT, PK and KD analyzed and interpreted study data. TT and JH drafted the manuscript and all authors were involved in editing and final review of drafts. All authors have approved the final manuscript.

### **Availability of data and materials**

All relevant data are included in the article. Datasets used during the current study are available from the corresponding author on reasonable request.

### **Competing interests**

The authors report no competing interests.

### **Funding details**

This work was supported by the Conrad N. Hilton Foundation. KD's time was partially funded by the Fogarty International Center through K01TW011484. She receives support from the UCLA CFAR grant AI028697 and the UCLA AIDS Institute. TT's time was supported by the David Geffen School of Medicine Global Short-term Training Program. The funders had no role in study design, data collection and analysis, decision to publish, or preparation of the manuscript.



### License statement

I, the Submitting Author has the right to grant and does grant on behalf of all authors of the Work (as defined in the below author licence), an exclusive licence and/or a non-exclusive licence for contributions from authors who are: i) UK Crown employees; ii) where BMJ has agreed a CC-BY licence shall apply, and/or iii) in accordance with the terms applicable for US Federal Government officers or employees acting as part of their official duties; on a worldwide, perpetual, irrevocable, royalty-free basis to BMJ Publishing Group Ltd (“BMJ”) its licensees and where the relevant Journal is co-owned by BMJ to the co-owners of the Journal, to publish the Work in BMJ Global Health and any other BMJ products and to exploit all rights, as set out in our licence.

The Submitting Author accepts and understands that any supply made under these terms is made by BMJ to the Submitting Author unless you are acting as an employee on behalf of your employer or a postgraduate student of an affiliated institution which is paying any applicable article publishing charge (“APC”) for Open Access articles. Where the Submitting Author wishes to make the Work available on an Open Access basis (and intends to pay the relevant APC), the terms of reuse of such Open Access shall be governed by a Creative Commons licence – details of these licences and which Creative Commons licence will apply to this Work are set out in our licence referred to above.

## References

1. 2013 UNAIDS Report on the global AIDS epidemic | UNAIDS. [https://www.unaids.org/en/resources/documents/2013/20130923\\_UNAIDS\\_Global\\_Report\\_2013](https://www.unaids.org/en/resources/documents/2013/20130923_UNAIDS_Global_Report_2013). Accessed February 12, 2020.
2. WHO | Global guidance on criteria and processes for validation: Elimination of Mother-to-Child Transmission of HIV and Syphilis. *WHO*. 2019.
3. Daelmans B, Black MM, Lombardi J, et al. Effective interventions and strategies for improving early child development. *BMJ*. 2015;351:h4029. doi:10.1136/bmj.h4029
4. Gourlay A, Birdthistle I, Mburu G, Iorpenda K, Wringe A. Barriers and facilitating factors to the uptake of antiretroviral drugs for prevention of mother-to-child transmission of HIV in sub-Saharan Africa: A systematic review. *J Int AIDS Soc*. 2013;16(1). doi:10.7448/IAS.16.1.18588
5. Koo K, Makin JD, Forsyth BWC. Barriers to male-partner participation in programs to prevent mother-to-child HIV transmission in south Africa. *AIDS Educ Prev*. 2013;25(1):14-24. doi:10.1521/aeap.2013.25.1.14
6. Aluisio A, Richardson BA, Bosire R, John-Stewart G, Mbori-Ngacha D, Farquhar C. Male antenatal attendance and HIV testing are associated with decreased infant HIV infection and increased HIV-free survival. *J Acquir Immune Defic Syndr*. 2011;56(1):76-82. doi:10.1097/QAI.0b013e3181fdb4c4
7. Van den Berg (ed). *State of Africa's Fathers: A MenCare Advocacy Publication. Adapted from Levtoy R, van Der Gaag N, Greene M, Kaufman M, and Barker H. State of the World's Fathers: A MenCare Advocacy Publication*. Washington D.C.; 2015.
8. Nkwonta CA, Messias DAKH. Male participation in reproductive health interventions in Sub-Saharan Africa: A scoping review. *Int Perspect Sex Reprod Health*. 2019;45:71-85. doi:10.1363/45e8119
9. Engle PL, Breaux C. Fathers' Involvement with Children: Perspectives from Developing Countries. *Soc Policy Rep*. 1998;12(1):1-24. doi:10.1002/j.2379-3988.1998.tb00007.x
10. Garcia M, Pence A, Evans JL. *Africa's Future, Africa's Challenge Early Childhood Care and Development in Sub-Saharan Africa Human Development*.; 2008.
11. Colvin CJ. Gender, Health and Change in South Africa: Three Ways of Working with Men and Boys for Gender Justice. *Rech Sociol Anthropol RS A*. 2017;48(1):109.
12. Ditekemena J, Koole O, Engmann C, et al. Determinants of male involvement in maternal and child health services in sub-Saharan Africa: a review. *Reprod Health*. 2012;9(1):32. doi:10.1186/1742-4755-9-32
13. Britto PR, Lye SJ, Proulx K, et al. Nurturing care: promoting early childhood development. *Lancet*. 2017;389(10064):91-102. doi:10.1016/S0140-6736(16)31390-3
14. WHO | Care for child development: improving the care for young children. *WHO*. 2019.
15. Cataldo F, Sam-Agudu NA, Phiri S, Shumba B, Cornelius LJ, Foster G. The roles of expert mothers engaged in prevention of mother-to-child transmission (PMTCT) programs: A commentary on the INSPIRE studies in Malawi, Nigeria, and Zimbabwe. *J Acquir Immune Defic Syndr*. 2017;75:S224-S232. doi:10.1097/QAI.0000000000001375
16. Theuring S, Mbezi P, Luvanda H, Jordan-Harder B, Kunz A, Harms G. Male involvement in PMTCT services in Mbeya Region, Tanzania. *AIDS Behav*. 2009;13(SUPPL. 1):92-102. doi:10.1007/s10461-009-9543-0
17. Comrie-Thomson L, Mavhu W, Makungu C, et al. Male involvement interventions and improved couples' emotional relationships in Tanzania and Zimbabwe: 'When we are

- walking together, I feel happy.' *Cult Health Sex*. August 2019:1-18.  
doi:10.1080/13691058.2019.1630564
18. Cunningham SA, Elo IT, Herbst K, Hosegood V. Prenatal development in rural South Africa: relationship between birth weight and access to fathers and grandparents. *Popul Stud (NY)*. 2010;64(3):229-246. doi:10.1080/00324728.2010.510201
  19. Montgomery CM, Hosegood V, Busza J, Timaeus IM. Men's involvement in the South African family: engendering change in the AIDS era. *Soc Sci Med*. 2006;62(10):2411-2419. doi:10.1016/J.SOCSCIMED.2005.10.026
  20. Aluisio AR, Bosire R, Bourke B, et al. Male partner participation in antenatal clinic services is associated with improved HIV-free survival among infants in Nairobi, Kenya: A prospective cohort study. *J Acquir Immune Defic Syndr*. 2016;73(2):169-176. doi:10.1097/QAI.0000000000001038
  21. Sifunda S, Peltzer K, Rodriguez VJ, et al. Impact of male partner involvement on mother-to-child transmission of HIV and HIV-free survival among HIV-exposed infants in rural South Africa: Results from a two phase randomised controlled trial. Price MA, ed. *PLoS One*. 2019;14(6):e0217467. doi:10.1371/journal.pone.0217467
  22. Manda-Taylor L, Mwale D, Phiri T, et al. Changing times? Gender roles and relationships in maternal, newborn and child health in Malawi. *BMC Pregnancy Childbirth*. 2017;17(1):321. doi:10.1186/s12884-017-1523-1
  23. Morfaw F, Mbuagbaw L, Thabane L, et al. Male involvement in prevention programs of mother to child transmission of HIV: a systematic review to identify barriers and facilitators. *Syst Rev*. 2013;2(1):5. doi:10.1186/2046-4053-2-5
  24. Aliyu MH, Blevins M, Audet CM, et al. Integrated prevention of mother-to-child HIV transmission services, antiretroviral therapy initiation, and maternal and infant retention in care in rural north-central Nigeria: A cluster-randomised controlled trial. *Lancet HIV*. 2016;3(5):e202-e211. doi:10.1016/S2352-3018(16)00018-7
  25. Audet CM, Blevins M, Chire YM, et al. Engagement of Men in Antenatal Care Services: Increased HIV Testing and Treatment Uptake in a Community Participatory Action Program in Mozambique. *AIDS Behav*. 2016;20(9):2090-2100. doi:10.1007/s10461-016-1341-x
  26. Semrau K, Kuhn L, Vwalika C, et al. Women in couples antenatal HIV counseling and testing are not more likely to report adverse social events. *AIDS*. 2005;19(6):603-609. doi:10.1097/01.aids.0000163937.07026.a0
  27. Takah NF, Kennedy ITR, Johnman C. The impact of approaches in improving male partner involvement in the prevention of mother-to-child transmission of HIV on the uptake of maternal antiretroviral therapy among HIV-seropositive pregnant women in sub-Saharan Africa: A systematic review and meta-analysis. *BMJ Open*. 2017;7(11):e018207. doi:10.1136/bmjopen-2017-018207

| No. | Topic | Title and abstract                                                                           | Item                                                                                                                                                                                                                                                                                                                                             |
|-----|-------|----------------------------------------------------------------------------------------------|--------------------------------------------------------------------------------------------------------------------------------------------------------------------------------------------------------------------------------------------------------------------------------------------------------------------------------------------------|
| S1  |       | Title                                                                                        | Concise description of the nature and topic of the study identifying the study as qualitative or indicating the approach (e.g., ethnography, grounded theory) or data collection methods (e.g., interview, focus group) is recommended                                                                                                           |
| S2  |       | Abstract                                                                                     | Summary of key elements of the study using the abstract format of the intended publication; typically includes background, purpose, methods, results, and conclusions                                                                                                                                                                            |
| 1   |       |                                                                                              |                                                                                                                                                                                                                                                                                                                                                  |
| 2   |       | <b>Introduction</b>                                                                          |                                                                                                                                                                                                                                                                                                                                                  |
| S3  |       | Problem formulation                                                                          | Description and significance of the problem/phenomenon studied; review of relevant theory and empirical work; problem statement                                                                                                                                                                                                                  |
| 3   |       |                                                                                              |                                                                                                                                                                                                                                                                                                                                                  |
| S4  |       | Purpose or research question                                                                 | Purpose of the study and specific objectives or questions                                                                                                                                                                                                                                                                                        |
| 4   |       | <b>Methods</b>                                                                               |                                                                                                                                                                                                                                                                                                                                                  |
| S5  |       | Qualitative approach and research paradigm                                                   | Qualitative approach (e.g., ethnography, grounded theory, case study, phenomenology, narrative research) and guiding theory if appropriate; identifying the research paradigm (e.g., postpositivist, constructivist/interpretivist) is also recommended; rationale <sup>a</sup>                                                                  |
| 5   |       |                                                                                              |                                                                                                                                                                                                                                                                                                                                                  |
| S6  |       | Researcher characteristics and reflexivity                                                   | Researchers' characteristics that may influence the research, including personal attributes, qualifications/experience, relationship with participants, assumptions, and/or presuppositions; potential or actual interaction between researchers' characteristics and the research questions; approach, methods, results, and/or transferability |
| 6   |       |                                                                                              |                                                                                                                                                                                                                                                                                                                                                  |
| 7   |       |                                                                                              |                                                                                                                                                                                                                                                                                                                                                  |
| 8   |       |                                                                                              |                                                                                                                                                                                                                                                                                                                                                  |
| S7  |       | Context                                                                                      | Setting/site and salient contextual factors; rationale <sup>b</sup>                                                                                                                                                                                                                                                                              |
| 9   |       |                                                                                              |                                                                                                                                                                                                                                                                                                                                                  |
| S8  |       | Sampling strategy                                                                            | How and why research participants, documents, or events were selected; criteria for deciding when no further sampling was necessary (e.g., sampling saturation); rationale <sup>b</sup>                                                                                                                                                          |
| 10  |       |                                                                                              |                                                                                                                                                                                                                                                                                                                                                  |
| S9  |       | Ethical issues pertaining to human subjects                                                  | Documentation of approval by an appropriate ethics review board and participant consent, or explanation for lack thereof; other confidentiality and data security issues                                                                                                                                                                         |
| 11  |       |                                                                                              |                                                                                                                                                                                                                                                                                                                                                  |
| 12  |       |                                                                                              |                                                                                                                                                                                                                                                                                                                                                  |
| S10 |       | Data collection methods                                                                      | Types of data collected; details of data collection procedures including (as appropriate) start and stop dates of data collection and analysis, iterative process, triangulation of sources/methods, and modification of procedures in response to evolving study findings; rationale <sup>b</sup>                                               |
| 13  |       |                                                                                              |                                                                                                                                                                                                                                                                                                                                                  |
| 14  |       |                                                                                              |                                                                                                                                                                                                                                                                                                                                                  |
| S11 |       | Data collection instruments and technologies                                                 | Description of instruments (e.g., interview guides, questionnaires) and devices (e.g., audio recorders) used for data collection; if/how the instrument(s) changed over the course of the study                                                                                                                                                  |
| 15  |       |                                                                                              |                                                                                                                                                                                                                                                                                                                                                  |
| S12 |       | Units of study                                                                               | Number and relevant characteristics of participants, documents, or events included in the study; level of participation (could be reported in results)                                                                                                                                                                                           |
| 16  |       |                                                                                              |                                                                                                                                                                                                                                                                                                                                                  |
| S13 |       | Data processing                                                                              | Methods for processing data prior to and during analysis, including transcription, data entry, data management and security, verification of data integrity, data coding, and anonymization/deidentification of excerpts                                                                                                                         |
| 17  |       |                                                                                              |                                                                                                                                                                                                                                                                                                                                                  |
| 18  |       |                                                                                              |                                                                                                                                                                                                                                                                                                                                                  |
| S14 |       | Data analysis                                                                                | Process by which inferences, themes, etc., were identified and developed, including the researchers involved in data analysis; usually references a specific paradigm or approach; rationale <sup>b</sup>                                                                                                                                        |
| 19  |       |                                                                                              |                                                                                                                                                                                                                                                                                                                                                  |
| 20  |       |                                                                                              |                                                                                                                                                                                                                                                                                                                                                  |
| S15 |       | Techniques to enhance trustworthiness                                                        | Techniques to enhance trustworthiness and credibility of data analysis (e.g., member checking, audit trail, triangulation); rationale <sup>b</sup>                                                                                                                                                                                               |
| 21  |       |                                                                                              |                                                                                                                                                                                                                                                                                                                                                  |
| 22  |       | <b>Results/findings</b>                                                                      |                                                                                                                                                                                                                                                                                                                                                  |
| S16 |       | Synthesis and interpretation                                                                 | Main findings (e.g., interpretations, inferences, and themes); might include development of a theory or model, or integration with prior research or theory                                                                                                                                                                                      |
| 23  |       |                                                                                              |                                                                                                                                                                                                                                                                                                                                                  |
| S17 |       | Links to empirical data                                                                      | Evidence (e.g., quotes, field notes, text excerpts, photographs) to substantiate analytic findings                                                                                                                                                                                                                                               |
| 24  |       |                                                                                              |                                                                                                                                                                                                                                                                                                                                                  |
| 25  |       | <b>Discussion</b>                                                                            |                                                                                                                                                                                                                                                                                                                                                  |
| S18 |       | Integration with prior work, implications, transferability, and contribution(s) to the field | Short summary of main findings; explanation of how findings and conclusions connect to, support, elaborate on, or challenge conclusions of earlier scholarship; discussion of scope of application/generalizability; identification of unique contribution(s) to scholarship in a discipline or field                                            |
| 26  |       |                                                                                              |                                                                                                                                                                                                                                                                                                                                                  |
| 27  |       |                                                                                              |                                                                                                                                                                                                                                                                                                                                                  |
| S19 |       | Limitations                                                                                  | Trustworthiness and limitations of findings                                                                                                                                                                                                                                                                                                      |
| 28  |       | <b>Other</b>                                                                                 |                                                                                                                                                                                                                                                                                                                                                  |
| S20 |       | Conflicts of interest                                                                        | Potential sources of influence or perceived influence on study conduct and conclusions; how these were managed                                                                                                                                                                                                                                   |
| 29  |       |                                                                                              |                                                                                                                                                                                                                                                                                                                                                  |
| S21 |       | Funding                                                                                      | Sources of funding and other support; role of funders in data collection, interpretation, and reporting                                                                                                                                                                                                                                          |
| 30  |       |                                                                                              |                                                                                                                                                                                                                                                                                                                                                  |
| 31  |       |                                                                                              |                                                                                                                                                                                                                                                                                                                                                  |

The SRQR was created by searching the literature to identify guidelines, reporting standards, and other empirical information on qualitative research, including the role of experts in training and consulting experts to gain feedback. The SRQR aims to improve the transparency of all aspects of qualitative research by providing clear standards for reporting qualitative research.

The rationale should briefly discuss the justification for choosing that theory, approach, method, or technique rather than other options available, the assumptions and limitations implicit in those choices, and how those choices influence study conclusions and transferability. As appropriate, the rationale for several items might be assessed together.

© <http://bmjopen.bmj.com/site/about/guidelines.xhtml>

ACADEMIC MEDICINE

# BMJ Open

## Men care too: a qualitative study examining women's perceptions of fathers' engagement in early childhood development (ECD) during an ECD program for HIV-positive mothers in Malawi

|                                 |                                                                                                                                                                                                                                                                                                                                                                                                                                                                                                                                                                                                                                                                                                                                                                                                                                                                                                                                                                                                                                                                                                                     |
|---------------------------------|---------------------------------------------------------------------------------------------------------------------------------------------------------------------------------------------------------------------------------------------------------------------------------------------------------------------------------------------------------------------------------------------------------------------------------------------------------------------------------------------------------------------------------------------------------------------------------------------------------------------------------------------------------------------------------------------------------------------------------------------------------------------------------------------------------------------------------------------------------------------------------------------------------------------------------------------------------------------------------------------------------------------------------------------------------------------------------------------------------------------|
| Journal:                        | <i>BMJ Open</i>                                                                                                                                                                                                                                                                                                                                                                                                                                                                                                                                                                                                                                                                                                                                                                                                                                                                                                                                                                                                                                                                                                     |
| Manuscript ID                   | bmjopen-2021-056976.R1                                                                                                                                                                                                                                                                                                                                                                                                                                                                                                                                                                                                                                                                                                                                                                                                                                                                                                                                                                                                                                                                                              |
| Article Type:                   | Original research                                                                                                                                                                                                                                                                                                                                                                                                                                                                                                                                                                                                                                                                                                                                                                                                                                                                                                                                                                                                                                                                                                   |
| Date Submitted by the Author:   | 24-Apr-2022                                                                                                                                                                                                                                                                                                                                                                                                                                                                                                                                                                                                                                                                                                                                                                                                                                                                                                                                                                                                                                                                                                         |
| Complete List of Authors:       | Temelkowska, Tijana; University of California Los Angeles<br>Kalande, Pericles ; Partners in Hope Medical Center, Implementation Science Department<br>Udedi, Evelyn ; Partners in Hope Medical Center, Implementation Science Department<br>Bruns, Laurie; University of California Los Angeles, Global Health Institute<br>Mulungu, Siyenunu; Partners in Hope Medical Center, Implementation Science Department<br>Hubbard, Julie; University of California Los Angeles, Division of Infectious Diseases ; Partners in Hope Medical Center, Implementation Science Department<br>Gupta, Sundeep; University of California Los Angeles, Division of Infectious Diseases; Partners in Hope Medical Center<br>Richter, Linda; University of the Witwatersrand, Centre of Excellence in Human Development<br>Coates, Thomas; University of California Los Angeles, Division of Infectious Diseases; University of California Global Health Institute<br>Dovel , Kathryn ; University of California Los Angeles, Division of Infectious Diseases ; Partners in Hope Medical Center, Implementation Science Department |
| <b>Primary Subject Heading</b>: | Global health                                                                                                                                                                                                                                                                                                                                                                                                                                                                                                                                                                                                                                                                                                                                                                                                                                                                                                                                                                                                                                                                                                       |
| Secondary Subject Heading:      | HIV/AIDS, Public health                                                                                                                                                                                                                                                                                                                                                                                                                                                                                                                                                                                                                                                                                                                                                                                                                                                                                                                                                                                                                                                                                             |
| Keywords:                       | QUALITATIVE RESEARCH, Community child health < PAEDIATRICS, HIV & AIDS < INFECTIOUS DISEASES                                                                                                                                                                                                                                                                                                                                                                                                                                                                                                                                                                                                                                                                                                                                                                                                                                                                                                                                                                                                                        |
|                                 |                                                                                                                                                                                                                                                                                                                                                                                                                                                                                                                                                                                                                                                                                                                                                                                                                                                                                                                                                                                                                                                                                                                     |

SCHOLARONE™  
Manuscripts



I, the Submitting Author has the right to grant and does grant on behalf of all authors of the Work (as defined in the below author licence), an exclusive licence and/or a non-exclusive licence for contributions from authors who are: i) UK Crown employees; ii) where BMJ has agreed a CC-BY licence shall apply, and/or iii) in accordance with the terms applicable for US Federal Government officers or employees acting as part of their official duties; on a worldwide, perpetual, irrevocable, royalty-free basis to BMJ Publishing Group Ltd ("BMJ") its licensees and where the relevant Journal is co-owned by BMJ to the co-owners of the Journal, to publish the Work in this journal and any other BMJ products and to exploit all rights, as set out in our [licence](#).

The Submitting Author accepts and understands that any supply made under these terms is made by BMJ to the Submitting Author unless you are acting as an employee on behalf of your employer or a postgraduate student of an affiliated institution which is paying any applicable article publishing charge ("APC") for Open Access articles. Where the Submitting Author wishes to make the Work available on an Open Access basis (and intends to pay the relevant APC), the terms of reuse of such Open Access shall be governed by a Creative Commons licence – details of these licences and which [Creative Commons](#) licence will apply to this Work are set out in our licence referred to above.

Other than as permitted in any relevant BMJ Author's Self Archiving Policies, I confirm this Work has not been accepted for publication elsewhere, is not being considered for publication elsewhere and does not duplicate material already published. I confirm all authors consent to publication of this Work and authorise the granting of this licence.

1  
2  
3 1 Men care too: a qualitative study examining women's perceptions of fathers' engagement in  
4 2 early childhood development (ECD) during an ECD program for HIV-positive mothers in  
5 3 Malawi  
6 4  
7 5  
8 6

9 6 T. Temelkovska<sup>1</sup>, P C Kalande<sup>2</sup>, E Udedi<sup>2</sup>, L Bruns<sup>3,4</sup>, S Mulungu<sup>2</sup>, J Hubbard<sup>3</sup>, S Gupta<sup>2,3</sup>, L  
10 7 Richter<sup>5</sup>, T Coates<sup>3,4</sup>, K Dovel<sup>2,3</sup>  
11 8

- 13 9 1. David Geffen School of Medicine, University of California Los Angeles, United States  
14 10 2. Partners in Hope, Lilongwe, Malawi  
15 11 3. Division of Infectious Diseases, David Geffen School of Medicine, University of  
16 12 California Los Angeles, United States  
17 13 4. University of California Global Health Institute, United States  
18 14 5. DSI-NRF Centre of Excellence in Human Development, University of the  
19 15 Witwatersrand, Johannesburg, South Africa  
20 16

22 16  
23 17 Corresponding author:

24 18 [ttemelkovska@mednet.ucla.edu](mailto:ttemelkovska@mednet.ucla.edu) (TT)  
25 19  
26  
27  
28  
29  
30  
31  
32  
33  
34  
35  
36  
37  
38  
39  
40  
41  
42  
43  
44  
45  
46  
47  
48  
49  
50  
51  
52  
53  
54  
55  
56  
57  
58  
59  
60

1  
2  
3 **20 Abstract**

4 21

5 **22 Objectives:**

6 **23** Integrated early childhood development (ECD) and prevention of mother to child transmission  
7 **24** (PMTCT) interventions rarely target fathers, a missed opportunity given existing research  
8 **25** demonstrating that father involvement improves maternal and child outcomes. We aimed to  
9 **26** explore mother's perceptions of fathers' buy-in to an integrated PMTCT-ECD program, any  
10 **27** impact the program had on couple dynamics, and perceived barriers to fathers' involvement in  
11 **28** ECD activities.

12 **29 Design:**

13 **30** Qualitative study using individual in-depth interviews with mothers participating in a PMTCT-  
14 **31** ECD program. Interviews assessed mothers' perceptions of father buy-in and engagement in the  
15 **32** program and ECD activities. Data were coded using inductive and deductive strategies and  
16 **33** analyzed using constant comparison methods in Atlas.ti v1.6.

17 **34 Setting:**

18 **35** Four health facilities in Malawi where PMTCT services were provided.

19 **36 Participants:**

20 **37** Study participants were mothers living with HIV who were enrolled in the PMTCT-ECD  
21 **38** program for >6 months.

22 **39 Interventions:**

23 **40** The PMTCT-ECD intervention provided ECD education and counseling sessions during routine  
24 **41** PMTCT visits for mothers living with HIV and their infants (infant age 1.5-24 months). The  
25 **42** intervention did not target fathers, but mothers were encouraged to share information with them.

26 **43 Results:**

27 **44** Interviews were conducted with 29 mothers. Almost all mothers discussed the PMTCT-ECD  
28 **45** intervention with male partners. Most mothers reported that fathers viewed ECD as valuable and  
29 **46** practiced ECD activities at home. Several reported improved partner relationships and increased  
30 **47** communication due to the intervention. However, most mothers believed fathers would not  
31 **48** attend the PMTCT-ECD intervention due to concerns regarding HIV-related stigma at PMTCT  
32 **49** clinics, time required to attend, and perceptions that the intervention was intended for women.

33 **50 Conclusions:**

34 **51** Fathers were interested in an integrated PMTCT-ECD program and actively practiced ECD  
35 **52** activities at home, but felt uncomfortable visiting PMTCT clinics. Interventions should consider  
36 **53** direct community outreach or implementing ECD programs at facility entry points where men  
37 **54** frequent, such as outpatient departments.

38 55

39 56

40

41

42

43

44

45

46

47

48

49

50

51

52

53

54

55



1  
2  
3 57 **Article summary**  
4 58

5 59 ***Strengths and limitations of this study***  
6

- 7 60 • Reaching fathers in Sub-Saharan Africa with early childhood development (ECD)  
8 61 strategies may improve child developmental outcomes, as well as family engagement  
9 62 with health services. This may be particularly true for children affected by HIV, who are  
10 63 more vulnerable to poor health and developmental outcomes.  
11 64 • Men are rarely included in early childhood development (ECD) programs. Given this  
12 65 gap, we explored the role of an ECD program on men's interest in, engagement in, and  
13 66 unmet needs regarding ECD activities in Malawi. We focus on the male partners of  
14 67 women living with HIV who were enrolled in an integrated prevention-of-mother-to-  
15 68 child-transmission (PMTCT) and ECD program for a minimum of 6 months.  
16 69 • The study design and research question were based on strong conceptual framework from  
17 70 existing literature regarding male caregiver involvement in maternal/ child health  
18 71 programs and in children's lives.  
19 72 • This study is limited by its reliance on mothers' perceptions of their male partners  
20 73 attitudes and engagement in ECD activities.  
21 74  
22 75  
23  
24  
25  
26  
27  
28  
29  
30  
31  
32  
33  
34  
35  
36  
37  
38  
39  
40  
41  
42  
43  
44  
45  
46  
47  
48  
49  
50  
51  
52  
53  
54  
55  
56  
57  
58  
59  
60

## 76 Introduction

77 Throughout sub-Saharan Africa, national HIV programs are transitioning from acute services to  
78 long-term, chronic care for those infected and affected by HIV. As countries transition, holistic,  
79 integrated health services are being prioritized. Prevention of mother-to-child transmission  
80 (PMTCT) services can especially benefit from a holistic approach. Across the region  
81 approximately 90-95% of HIV positive pregnant women are on antiretroviral therapy (ART) and  
82 child infections have dropped significantly – now is the time to promote holistic mother and  
83 child services, which can benefit PMTCT retention and mothers’ and children’s general well-  
84 being [1,2].

85  
86 Early Childhood Development (ECD) interventions represent one strategy to promote mothers’  
87 PMTCT retention and mother and child wellbeing. ECD programs are associated with improved  
88 physical, psychosocial, and cognitive skills in children [3]. Since HIV-exposed uninfected  
89 children are at higher risk of mortality and delayed development than HIV-unexposed children,  
90 there is an opportunity to reach some of the most vulnerable children with ECD. An integrated  
91 program may also encourage PMTCT retention by improving the PMTCT visit experience for  
92 women and offering another motivation for clinic attendance [4]. However, both PMTCT and  
93 ECD programs tend to focus on women and fail to engage male partners [5]. The lack of male  
94 engagement threatens the potential impact of both PMTCT and ECD strategies. Further, there are  
95 increasing calls for increased entry points for men to be engaged with health facilities. Excluding  
96 men from ECD programs misses key opportunities to engage men as caregivers, and eventually  
97 as clients.

98  
99 When men attend PMTCT programs, there is decreased risk of infant HIV infection and  
100 mortality [6]. Male involvement in PMTCT during pregnancy and after birth has been linked to  
101 improved maternal health behaviors, increased use of maternal and newborn health services, and  
102 is predictive of long-term involvement of fathers in their children’s lives [7]. A review of 18  
103 studies assessing male involvement in reproductive health interventions in sub-Saharan Africa  
104 found that male involvement was consistently associated with improved reproductive health  
105 outcomes and greater spousal communication [8]. Another review of behavioral couples-based  
106 interventions around the time of pregnancy found that male involvement had the potential to  
107 improve HIV preventive behaviors and infant survival [9]. With regard to ECD and child  
108 wellbeing, increased male caregiver involvement is associated with improved cognitive  
109 development, increased social responsiveness and greater school achievement among children  
110 [10,11].

111  
112 However, many obstacles limit male caregiver involvement in both PMTCT and ECD programs.  
113 Antenatal care (ANC) services and related PMTCT programs are often not designed to include  
114 men [5]. Healthcare providers, who are accustomed to speaking to women, have reported feeling  
115 uncomfortable talking about PMTCT or ECD with men [11]. This likely contributes to men’s  
116 perception of PMTCT and under-five clinics as ‘female spaces’ and not ‘male-friendly’ [5].  
117 Other barriers to men’s PMTCT engagement include men’s time constraints due to employment,  
118 lack of knowledge about PMTCT strategies and the importance of men as caregivers, harmful  
119 gender norms that discourage open communication and joint decision making among couples,  
120 and the fact that male attendance is still not expected or required by community members or  
121 health care providers [5,12-15]. Similar barriers likely also affect men’s involvement in ECD

1  
2  
3 122 programs, although very little research has examined men's engagement in ECD programs [16].  
4 123 In order to develop successful, holistic PMTCT services, more research is needed to explore how  
5 124 to design and implement integrated PMTCT and ECD strategies that effectively engage men.  
6 125

7  
8 126 We conducted in-depth interviews with mothers participating in an integrated PMTCT-ECD  
9 127 intervention in Malawi in order to investigate mothers' perception of fathers' buy-in to the  
10 128 integrated PMTCT-ECD program, level of fathers' involvement in ECD activities with their  
11 129 children at home, and any indirect effects the program had on couple dynamics and  
12 130 communication. We also aimed to explore perceived barriers to male caregiver involvement in  
13 131 the PMTCT-ECD program, as well as mothers' recommendations to facilitate greater male  
14 132 engagement.  
15 133

### 16 134 **Methods**

17  
18 135 The primary objectives of this study were to use qualitative interviews to evaluate mothers'  
19 136 perceptions of male partners' experiences with and perceptions of an integrated PMTCT-ECD  
20 137 intervention in Malawi.  
21 138

### 22 139 ***The Intervention***

23  
24 140 A detailed description of the PMTCT-ECD intervention can be found elsewhere [17]. In brief,  
25 141 we conducted an integrated PMTCT-ECD intervention for HIV-positive mothers and their young  
26 142 children (aged 1.5-24 months) in six health facilities in central Malawi. Facilities varied in size,  
27 143 type (district hospital, mission hospital, health center), and district (Lilongwe, Kasungu,  
28 144 Nkhotakota). Mothers who were HIV-positive, enrolled in PMTCT programs at participating  
29 145 facilities, and whose youngest child was <8 weeks of age were recruited to participate in the  
30 146 integrated PMTCT-ECD program. Enrolled mothers received an interactive ECD skills  
31 147 development session during every PMTCT visit (every 1-3 months, depending on mothers' time  
32 148 since ART initiation and ART adherence measures) until they graduated from the PMTCT  
33 149 program when their child reached 24 months of age. Mothers could also access ECD sessions  
34 150 anytime they attended a facility, whether for PMTCT or not. ECD sessions were offered while  
35 151 mothers waited for routine health services, so participation did not require additional time or  
36 152 resources from the mothers.  
37 153

38  
39 154 ECD sessions followed the WHO-UNICEF 'Care for Child Development' package that  
40 155 sensitizes mothers to the developing cognitive, emotional and communication needs of their  
41 156 infants, and reinforces caregiving sensitivity and responsiveness through support and simple play  
42 157 activities [18]. Mothers are trained through interactive lessons, play, and demonstrated scenarios  
43 158 to talk and sing with infants at an early age, make eye contact, mimic infant vocalizations, and  
44 159 recognize and respond to their infant's developmental milestones. All sessions were  
45 160 implemented by trained ECD counselors who were 'Expert Clients', a Malawi cadre of HIV-  
46 161 positive community members who volunteer for a small monthly stipend to provide HIV  
47 162 counseling and support to infected individuals [19].  
48 163

### 49 164 ***Study Design***

50  
51 165 This was a qualitative study using individual in-depth interviews with mothers who had  
52 166 participated in the PMTCT-ECD intervention for >6 months. Given the relative lack of research  
53 167 in this specific area, we used a grounded theory approach [20]. Individual in-depth interviews  
54  
55  
56  
57  
58  
59

1  
2  
3 168 were used instead of focus group discussions in order to emphasize the experiences of individual  
4 169 participants and investigate the unique effects of the program within individual family units.  
5 170

### 7 171 ***Participant Selection***

8 172 Mothers participating in the PMTCT-ECD program were eligible for study participation if they  
9 173 had been enrolled in the program for >6 months in order to ensure exposure to the majority of the  
10 174 ECD curriculum. Participants were selected randomly in order to avoid biases in sample  
11 175 selection. Thirty-two mothers were randomly selected using a computer-generated random  
12 176 sequence of mothers and were stratified by health facility (8 participants selected from each of 4  
13 177 facilities) to ensure representation of all districts and facility types. Participants were invited by  
14 178 study staff for an in-depth interview at the health facility. Written informed consent was obtained  
15 179 from each participant prior to study participation.  
16 180

### 18 181 ***Interview guide***

19 182 The interview guide was developed based on existing literature and previous experiences with  
20 183 the PMTCT-ECD program and pilot [21,22]. Interview guides assessed mothers' ECD  
21 184 knowledge, practice, and male caregiver involvement in ECD. Specifically, with regard to male  
22 185 caregivers, mothers were asked to describe their perceptions of their male partners' attitudes  
23 186 towards the program, involvement in ECD activities at home, any indirect effects of the program  
24 187 on couple and family dynamics, and potential barriers to male caregivers' direct involvement  
25 188 with the PMTCT-ECD program at the health facilities. The interview guide was reviewed and  
26 189 edited by local study staff to ensure cultural humility and acceptability. Guides were piloted  
27 189 amongst three women to ensure comprehensibility and refined based on feedback.  
28 190  
29 191

### 31 192 ***Data Collection***

32 193 In-depth interviews were conducted from June to July 2019 with a random subset of 29 mothers  
33 194 enrolled in the PMTCT-ECD program across four implementing facilities for  $\geq 6$  months. Data  
34 195 collection was stopped after 29 interviews as thematic saturation had been reached. Interviews  
35 196 were conducted in the local language (Chichewa) by a trained, local female research assistant in  
36 197 private spaces in the health facilities. Interviews ranged in duration from 30-50 minutes and were  
37 198 audio recorded. Women were compensated 4000 Malawi Kwacha (approximately US \$5) for  
38 199 their transportation costs to attend the interview.  
40 200

### 41 201 ***Data analysis***

42 202 Audio recordings were translated and transcribed to English for analysis. For this paper, we only  
43 203 include interviews with women who report that the father of their youngest child was present in  
44 204 the child's daily life. Interviews with women who reported absent fathers were omitted from this  
45 205 analysis since absent fathers would not have been exposed to ECD sessions nor would they have  
46 206 a chance to practice ECD activities with the child. A preliminary codebook was generated using  
47 207 a combination of deductive and inductive approaches. Using deductive coding, we developed an  
48 207 a priori codebook based on an initial version of the interview guide and themes found in existing  
49 208 literature. Additional codes were added using inductive coding from pilot interviews, which  
50 209 allowed additional themes and theories to emerge from the preliminary data. Two investigators  
51 210 (TT and PK) coded the same five transcripts separately using Atlas.ti, compared codes, and  
52 211 resolved differences. One investigator was a Malawian researcher with extensive qualitative  
53 212 research experience. The other investigator was a U.S. medical student with training in  
54 213  
55 213  
56  
57  
58  
59  
60

214 qualitative research. An additional two transcripts were simultaneously coded with similar codes  
 215 between investigators. The final codebook was used by the same two investigators to code all  
 216 remaining transcripts. Data were analyzed using constant comparison methods. Below we  
 217 present dominant themes related to male engagement and fathers' understanding and interest in  
 218 PMTCT-ECD programs.

219

### 220 *Patient and Public Involvement*

221 Patients or the public were not involved in the design, conduct, reporting, or dissemination plans  
 222 of our research.

223

### 224 *Ethical Approval*

225 Ethical approval was attained from the University of California Los Angeles IRB (ID# 20-  
 226 003525) and the Malawi institutional review board, National Health Sciences Review Committee  
 227 (ID# 19/03/2429).

228

229

### 230 **Results**

231 Of the 32 mothers randomly selected for an interview, a total of 29 mothers were successfully  
 232 interviewed. Twenty-two mothers (76%) reported that the father of their youngest child was  
 233 present in the child's life and were included in this analysis. Mothers had a mean age of 30 years,  
 234 a median of 4 children, and only one woman had no education (Table 1). All mothers self-  
 235 reported attending the majority of ECD sessions. Half of these mothers reported that fathers  
 236 spent time with their youngest child on a daily basis, and only one mother reported that the father  
 237 spent time with the child once per week or less. All but one mother reported that they  
 238 communicated with the father about the ECD program. Almost all mothers reported that the  
 239 fathers' primary responsibility was to provide financially for their children, but that fathers also  
 240 played with children and looked after children when mothers were busy.

241

242

243

**Table 1. Respondent demographic characteristics**

| Variables (N=22)                   | Participants<br>N (%) |
|------------------------------------|-----------------------|
| Age, mean (range)                  | 30 (21-42)            |
| Married                            | 20 (91)               |
| Number of children, median (range) | 4 (1-8)               |
| Household primary income           |                       |
| Formal employment                  | 0                     |
| Informal employment                | 22 (100)              |
| Not working                        | 0                     |
| Education                          |                       |
| No education                       | 1 (5)                 |
| Primary                            | 10 (45)               |
| Secondary or higher                | 11 (50)               |

|                                               |          |
|-----------------------------------------------|----------|
| Male partner involvement                      |          |
| With infant every day                         | 11 (50)  |
| With infant several days a week               | 10 (45)  |
| With infant <1 days a week                    | 1 (5)    |
| Discussed PMTCT-ECD program with male partner | 21 (96)  |
| ECD session attendance                        |          |
| Attend most sessions                          | 22 (100) |
| Attend a few sessions                         | 0        |
| Dropped out of program                        | 0        |

### ***Fathers valued ECD and increased their engagement with their youngest child***

Most mothers reported that fathers had positive opinions towards the ECD program, reporting that male partners noticed the progress in their youngest child because of new ECD practices. In families with older children, mothers reported that their partners recognized differences between the youngest child and older siblings who were raised without the ECD program.

*[My husband] plays with the child and he has seen a change, he asks me why the child is different from the others and I tell him that we learn ECD at the hospital and they teach us about the child's behavior. – Mother of 8, age 31*

Most mothers reported that their partners supported and actively implemented ECD practices at home. Mothers directly shared ECD lessons learned from the intervention with their partner, and these lessons were put into practice by both parents.

*[My husband] was wondering why I was so fond of making things like balls and toy cars, and when he asked, I explained to him about [what I learned at] the ECD program. Now he helps me with making toys for the kid. – Mother of 7, age 34*

*After I told my husband about ECD, he is active with the child; he makes him porridge, sings to him, and plays with him – Mother of 2, age 21*

Mothers believed that male partners were motivated to practice ECD behavior with their children because their child gave immediate positive response to stimulation and because fathers understood the long-term benefit of ECD practices.

*ECD taught me about singing and playing with the child, and when the father of the child does this [singing and playing] and sees how the child is responding, he sees how important the ECD sessions are. – Mother of 3, age 20*

### ***Family relationships were strengthened as a result of increased communication and ECD knowledge sharing***

Several mothers reported that since the ECD program started, their male partners and youngest children have developed a closer, more intimate bond, reportedly due to increases in ECD knowledge and practices.

1  
2  
3 280  
4 281 *The bond has increased between [the father and the child] and I am able to leave the*  
5 282 *child with him and he is able to take care of the child. – Mother of 5, age 37*  
6 283

7 284  
8 284 Nearly all reported increases in communication, which often resulted in better teamwork and  
9 285 understanding between the couple. Over half of mothers reported improved relationships with  
10 286 their male partners since starting the ECD program. Frequently cited examples included sharing  
11 287 more responsibilities at home (improved equity), having a common goal regarding their children  
12 288 and childcare, encouragement and support of one another for individual and joint goals, and even  
13 289 living with less conflict due to increased communication and a sense of purpose for childrearing.  
14 290

15 291  
16 291 *Me and my husband are living in harmony because we are raising this child together.*  
17 292 *The father of the child has just realized that the responsibility is for the both of us. –*  
18 293 *Mother of 5, age 37*  
19 294

20 295  
21 295 *Because of the program, even when we are fighting, the issues that have to do with the*  
22 296 *child bring us together so that we even laugh together and forget the fight. – Mother of 4,*  
23 297 *age 31*  
24 298

### 25 299 **Remaining barriers to male partner attendance of the PMTCT-ECD program**

26 300 Only a few mothers believed that their partner would feel comfortable attending the PMTCT-  
27 301 ECD program, citing examples of their partners' active interest in the ECD sessions. However,  
28 302 only one mother reported that her partner routinely attended the PMTCT-ECD program. Some  
29 303 women believed that men in their community who attended antenatal visits to support their wives  
30 304 might also feel comfortable attending the ECD program, but men who were not comfortable  
31 305 attending antenatal or PMTCT visits would not attend ECD.  
32 306

33 307  
34 307 *I see [my husband's] interest from the way he reacts and asks questions to follow what*  
35 308 *we have learnt at the ECD program, so I think he might come [to the program]. – Mother*  
36 309 *of 7, age 34*  
37 310

38 311  
39 311 Most mothers believed that their partners would be unwilling to attend ECD sessions at the  
40 312 clinic, particularly because the PMTCT-ECD program was organized around PMTCT services.  
41 313 Several mothers stated that men would not feel comfortable being at PMTCT clinics due to  
42 314 stigma and concerns about being pressured to test for HIV while attending ECD sessions.  
43 315

44 316  
45 316 *Many fathers think that [health workers] will be talking to them in public and they will be*  
46 317 *embarrassed. I think the big problem for men is being shy. – Mother of 6, age 31*  
47 318

48 319 Other mothers reported that their partners believed that ECD sessions were only for women and  
49 320 would not attend but desired to hear about ECD through the female partner. These men still  
50 321 practiced ECD activities at home, but believed that men were not meant to attend the PMTCT-  
51 322 ECD intervention.  
52 323

53 324  
54 324 *Some men will not come because they might say that the program is meant for women not*  
55 325 *men. – Mother of 4, age 31*  
56  
57  
58  
59

326  
 327 Even if men felt comfortable coming to the clinic, many mothers identified other barriers to  
 328 participation. A majority of mothers reported that the time required to travel to the clinic and  
 329 wait for services was a significant barrier – most men would not sacrifice income-generating  
 330 activities to attend an ECD session.

331  
 332 *Men will not come [to ECD sessions] because when we come here we play with the kids*  
 333 *and he may consider that as wasting time; he would rather do other helpful things. –*  
 334 *Mother of 3, age 31*

### 335 336 **Additional strategies to engage men in ECD programs**

337 Almost all mothers believed that male caregiver engagement in ECD could be increased through  
 338 raising awareness and educating men about the importance of PMTCT-ECD activities for  
 339 children. Most suggested that the program needed to actively invite fathers to attend in order to  
 340 demonstrate that male caregivers are welcome and encouraged to participate in PMTCT-ECD.  
 341 Several mothers also believed that men would be more comfortable with male-only sessions.

342  
 343 *[Health workers] should make an effort to explain that both fathers and mothers are*  
 344 *important in ECD. They should help us explain [to male partners] that this is not a place*  
 345 *to force people to test blood [for HIV] but to know our responsibility as a father and*  
 346 *mother in caring for children. – Mother of 6, age 31*

347  
 348 *There is a need to invite the fathers as well. Tell the mothers to come with their husbands*  
 349 *so that the fathers should also be able to listen about ECD ... We should be able to bring*  
 350 *the husbands to the ECD so that we listen to the counseling together. – Mother of 2, age*  
 351 *26*

352  
 353 However, the majority mothers believed that men could best be reached outside the clinic. Most  
 354 suggested sending illustrated, informational pamphlets home with women after each PMTCT-  
 355 ECD visit to increase male engagement and awareness regarding ECD practices.

356  
 357 *Men are busy, even sometimes when they can't come for an [ART] refill here we get*  
 358 *drugs for them because they are so busy, but if they can read [the pamphlet] then they*  
 359 *will know what they are supposed to do. – Mother of 4, age 34*

360  
 361 Some mothers also suggested directly engaging men in the community to explain ECD through  
 362 phone calls or home visits to male partners of mothers in the ECD program, or larger community  
 363 meetings that incorporate all fathers within the community.

364  
 365 *Men should be sensitized to the importance of the program and also the need for the*  
 366 *participation of everyone. – Mother of 4, age 31*

367  
 368 *A woman should encourage her husband about the advantages of the ECD program and*  
 369 *also the counselors should be visiting them in their homes and encouraging them to be*  
 370 *coming to the sessions... If a man comes to get his drugs [ART] as well, he should be*



1  
2  
3 371 *encouraged to participate [in the ECD program]. The other way is to make phone calls*  
4 372 *to them and remind them about the meetings. – Mother of 5, age 34*

5 373  
6  
7 374 Finally, a few mothers suggested that ECD sessions should be integrated as part of normal clinic  
8 375 activities of men. For example, at outpatient or sexually transmitted infection (STI) departments  
9 376 where men frequent.

10 377  
11 378 *When [men] come to get drugs on their own, they should be briefed about ECD so the*  
12 379 *men who have children can get that information. – Mother of 4, age 34*

13 380

14 381

## 15 382 **Discussion**

16 383 Fathers play a critical role in child development and mothers' engagement in PMTCT strategies.  
17 384 We explored fathers' perception of an integrated PMTCT-ECD intervention that targeted  
18 385 mothers living with HIV in Malawi, including barriers to men's involvement, and  
19 386 recommendations for engaging men in ECD interventions in the future. We relied on secondary  
20 387 reports from mothers participating in the PMTCT-ECD program since they are most familiar  
21 388 with both intervention activities, and the fathers' perception of these activities. We found that  
22 389 nearly all mothers discussed ECD lessons with their male partners (fathers) frequently. Within a  
23 390 PMTCT-ECD intervention that was not specifically targeted to men, most fathers were perceived  
24 391 to have high levels of buy-in for the ECD intervention, accept ECD messaging, and actively  
25 392 practice ECD activities at home with their children. The PMTCT-ECD intervention increased  
26 393 couple communication within some relationships by providing the mother and father with a joint  
27 394 goal around ECD for their family. However, most mothers believed that fathers would not attend  
28 395 the intervention due to concerns regarding HIV-related stigma at PMTCT centers, time required  
29 396 to attend, and perceptions that the intervention was intended only for women.

30 397

31 398 Mothers believed that fathers were interested in gaining greater ECD skills and actively involved  
32 399 in actively involved in ECD activities at home. This supports other studies in South Africa  
33 400 reporting that many men are interested in education and counseling to prepare for fatherhood  
34 401 [13]. Our findings contradict literature that suggests that cultural perceptions regarding gender  
35 402 norms continue to be a major barrier to fathers' engagement in ECD and responsive childcare  
36 403 [10] – we find that fathers are, as reported by their female partners, largely seen as engaged and  
37 404 active parents at home. Future parenting and ECD programs should actively include and target  
38 405 fathers, who have been shown to support antenatal care and PMTCT, prioritize preparing for  
39 406 fatherhood, and may have a deep interest in learning responsive caregiving techniques [5,13,23].

40 407

41 408 Most mothers reported that fathers engagement in caregiving increased as a result of ECD  
42 409 knowledge gained from mothers' participation in the PMTCT-ECD program. As a result, some  
43 410 women believed that family relationships were strengthened due to increased couple  
44 411 communication and sharing of caregiver responsibilities between mother and father. These  
45 412 findings are consistent with a study in Tanzania and Zimbabwe that found that interventions  
46 413 aimed to increase male involvement in maternal and child health activities improved  
47 414 relationships and positive emotional outcomes among many couples, which further encouraged  
48 415 men's engagement as caregivers [24]. Other studies highlight the role of male partner  
49 416 engagement in providing additional social support to mothers, which can further improve ECD

50  
51  
52  
53  
54  
55  
56  
57  
58  
59  
60

1  
2  
3 417 outcomes [25,26]. Though not examined in our analysis, these positive effects on families may  
4 418 translate to secondary benefits as well. Other studies from the region have found associations  
5 419 between male partner involvement in PMTCT and subsequent health outcomes of both mothers  
6 420 and children including decreased risk of HIV transmission, decreased risk of child mortality, and  
7 421 increased maternal adherence to ART [26, 27]. These findings support the need to tailor  
8 422 programs such as PMTCT-ECD interventions for both parents and welcome fathers into these  
9 423 spaces in order to increase ECD knowledge and awareness among men and strengthen PMTCT  
10 424 through an integrated, holistic approach.  
11 425

12  
13  
14 426 Despite fathers' support for and value of ECD sessions, mothers believed most men were  
15 427 uncomfortable attending the current PMTCT-ECD program. This finding is supported by other  
16 428 studies in sub-Saharan Africa that have found that while many men are interested in participating  
17 429 in maternal and child health interventions, actual male attendance rates remain low [8,28]. Most  
18 430 mothers in our study believed male partners were uncomfortable attending these sessions  
19 431 because they were held at the ART clinic where men assumed they would be pressured or forced  
20 432 to test for HIV. Some mothers also reported that men believed the ECD sessions, and PMTCT  
21 433 services more broadly, were not meant for fathers. Our findings corroborate previous literature in  
22 434 Malawi and throughout Sub-Saharan Africa [29-31]. In their systematic review of barriers and  
23 435 facilitators of male partner involvement in PMTCT, Morfaw et al. also found the most salient  
24 436 barrier to male engagement was men's perception that PMTCT and antenatal clinics were  
25 437 'women's spaces', revealing that men need to be actively welcomed into facility spaces if  
26 438 perceptions of female-centered services are to be overcome [30]. A qualitative study in Malawi  
27 439 found that while men were comfortable with supporting their partners' antenatal clinic  
28 440 attendance in discrete ways (financial support, encouragement, reminders about clinic  
29 441 appointments), they felt that existing norms in their community prevented them from  
30 442 accompanying their partners to clinic appointments [15].  
31 443

32  
33  
34 444 To address these barriers to male involvement, the majority of mothers recommended using  
35 445 direct outreach targeting men in order to increase awareness about the importance of ECD and  
36 446 joint parenting. Some mothers also recommended actively inviting men to the current PMTCT-  
37 447 ECD program or providing ECD sessions at health facility services where men frequent (such as  
38 448 general outpatient services). A recent review found that making antenatal clinics more 'male-  
39 449 friendly' contributed to normalization of father attendance [32]. These findings suggest that  
40 450 efforts to tailor ECD programs to include fathers may promote community-wide acceptance of  
41 451 male caregiver involvement in such programs  
42 452

43  
44  
45 453 A range of community-based approaches throughout the region have also shown promising  
46 454 results in disseminating important maternal and child-related health information and promoting  
47 455 ECD. These include home visits to mothers and their partners by male community 'role models'  
48 456 and male health workers, and community dissemination via radio or community spaces  
49 457 frequented by men including football events, markets, and churches [30,33-35]. In Malawi  
50 458 specifically, community leaders or 'chiefs' can provide the leadership necessary to encourage  
51 459 and normalize male engagement in maternal and child health interventions at the community  
52 460 level [15,26]. One recent meta-analysis found that community education interventions had the  
53 461 greatest impact, more than clinic invitation letters, facility-based interventions and verbal  
54 462 encouragement [36]. However, community-based outreach is expensive and time consuming,  
55  
56  
57  
58  
59  
60

1  
2  
3 463 and may limit programs' scalability. Regardless, future integrated PMTCT programs should  
4 464 consider utilizing community services or restructuring facility spaces to directly engage men.  
5 465

### 6 466 **Limitations**

7  
8 467 This study has several limitations that should be noted. First, we rely on mothers' perceptions of  
9 468 their male partners – we do not have direct feedback from men themselves. Women participating  
10 469 in the study may have incomplete or skewed perceptions of their partners perceptions of and  
11 470 barriers to ECD sessions. Additional research is needed that directly engages fathers to further  
12 471 understand their perceptions of integrated PMTCT-ECD services, and how to engage them in  
13 472 these strategies. Second, the study is limited to mothers in central Malawi and may not be  
14 473 representative of other settings. However, our findings are similar to those found throughout the  
15 474 region, suggesting some comparability with other settings. Third, our data rely on mothers who  
16 475 were active in the PMTCT-ECD program for a minimum of 6 months. Future analyses should  
17 476 examine male engagement at the end of the program as fathers may show increased engagement  
18 477 over time.  
19 478

### 20 479 **Conclusion**

21  
22 480 Most mothers enrolled in a PMTCT-ECD program in Malawi believed fathers saw value in the  
23 481 PMTCT-ECD program, demonstrated interest in gaining ECD knowledge, and actively  
24 482 implemented ECD activities at home. Despite not having direct engagement with this PMTCT-  
25 483 ECD program, male caregivers still received ECD messaging and began to prioritize ECD  
26 484 activities at home, suggesting that men might be easily reached if programs were designed to  
27 485 include them. Although mothers reported increased interest in ECD among men, integrating  
28 486 PMTCT and ECD services alone was not enough to change perceptions that PMTCT is a  
29 487 women's space. The structure of PMTCT strategies should be revised if men are to be engaged.  
30 488 In addition, ECD strategies could be implemented in locations where men frequent (community  
31 489 or outpatient departments) in order to directly engage men in ECD program activities.  
32 490  
33 491  
34  
35  
36  
37  
38  
39  
40  
41  
42  
43  
44  
45  
46  
47  
48  
49  
50  
51  
52  
53  
54  
55  
56  
57  
58  
59  
60

1  
2  
3 **492 Acknowledgements**

4 493 The authors gratefully acknowledge the Partners in Hope team in Malawi, the program staff who  
5 494 implemented the intervention, the mothers who participates in the intervention and the research  
6 495 staff who collected study data.

7 496

8 497 **Author contributions**

9 498 TC and LR led the parent PMTCT-ECD trial design, with involvement from LB and EU. KD and  
10 499 TT conceptualized the study as it pertained to male caregivers. TT, PK, CM and SM lead study  
11 500 implementation and data collection with support from SG. TT, PK and KD analyzed and  
12 501 interpreted study data. TT and JH drafted the manuscript and all authors were involved in editing  
13 502 and final review of drafts. All authors have approved the final manuscript.

14 503

15 504 **Availability of data and materials**

16 505 All relevant data are included in the article. Datasets used during the current study are available  
17 506 from the corresponding author on reasonable request.

18 507

19 508 **Competing interests**

20 509 The authors report no competing interests.

21 510

22 511 **Funding details**

23 512 This work was supported by the Conrad N. Hilton Foundation. KD's time was partially funded  
24 513 by the Fogarty International Center through K01TW011484. She receives support from the  
25 514 UCLA CFAR grant AI028697 and the UCLA AIDS Institute. TT's time was supported by the  
26 515 David Geffen School of Medicine Global Short-term Training Program. The funders had no role  
27 516 in study design, data collection and analysis, decision to publish, or preparation of the  
28 517 manuscript.

29 518

30 519

31

32

33

34

35

36

37

38

39

40

41

42

43

44

45

46

47

48

49

50

51

52

53

54

55

1  
2  
3 **520 License statement**  
4

521  
522 I, the Submitting Author has the right to grant and does grant on behalf of all authors of the  
523 Work (as defined in the below author licence), an exclusive licence and/or a non-exclusive  
524 licence for contributions from authors who are: i) UK Crown employees; ii) where BMJ has  
525 agreed a CC-BY licence shall apply, and/or iii) in accordance with the terms applicable for US  
526 Federal Government officers or employees acting as part of their official duties; on a worldwide,  
527 perpetual, irrevocable, royalty-free basis to BMJ Publishing Group Ltd (“BMJ”) its licensees and  
528 where the relevant Journal is co-owned by BMJ to the co-owners of the Journal, to publish the  
529 Work in BMJ Global Health and any other BMJ products and to exploit all rights, as set out in  
530 our licence.  
531

532 The Submitting Author accepts and understands that any supply made under these terms is made  
533 by BMJ to the Submitting Author unless you are acting as an employee on behalf of your  
534 employer or a postgraduate student of an affiliated institution which is paying any applicable  
535 article publishing charge (“APC”) for Open Access articles. Where the Submitting Author  
536 wishes to make the Work available on an Open Access basis (and intends to pay the relevant  
537 APC), the terms of reuse of such Open Access shall be governed by a Creative Commons licence  
538 – details of these licences and which Creative Commons licence will apply to this Work are set  
539 out in our licence referred to above.  
540

541 **References**

- 542 1. 2013 UNAIDS Report on the global AIDS epidemic | UNAIDS.  
543 [https://www.unaids.org/en/resources/documents/2013/20130923\\_UNAIDS\\_Global\\_Report\\_2013](https://www.unaids.org/en/resources/documents/2013/20130923_UNAIDS_Global_Report_2013). Accessed February 12, 2020.
- 544 2. WHO | Global guidance on criteria and processes for validation: Elimination of Mother-to-Child Transmission of HIV and Syphilis. *WHO*. 2019.
- 545 3. Daelmans B, Black MM, Lombardi J, et al. Effective interventions and strategies for improving early child development. *BMJ*. 2015;351:h4029. doi:10.1136/bmj.h4029
- 546 4. Gourlay A, Birdthistle I, Mburu G, Iorpenda K, Wringe A. Barriers and facilitating factors to the uptake of antiretroviral drugs for prevention of mother-to-child transmission of HIV in sub-Saharan Africa: A systematic review. *J Int AIDS Soc*. 2013;16(1). doi:10.7448/IAS.16.1.18588
- 547 5. Koo K, Makin JD, Forsyth BWC. Barriers to male-partner participation in programs to prevent mother-to-child HIV transmission in south Africa. *AIDS Educ Prev*. 2013;25(1):14-24. doi:10.1521/aeap.2013.25.1.14
- 548 6. Aluisio A, Richardson BA, Bosire R, John-Stewart G, Mbori-Ngacha D, Farquhar C. Male antenatal attendance and HIV testing are associated with decreased infant HIV infection and increased HIV-free survival. *J Acquir Immune Defic Syndr*. 2011;56(1):76-82. doi:10.1097/QAI.0b013e3181fdb4c4
- 549 7. Van den Berg (ed). *State of Africa's Fathers: A MenCare Advocacy Publication. Adapted from Levtoy R, van Der Gaag N, Greene M, Kaufman M, and Barker H. State of the World's Fathers: A MenCare Advocacy Publication*. Washington D.C.; 2015.
- 550 8. Nkwonta CA, Messias DAKH. Male participation in reproductive health interventions in Sub-Saharan Africa: A scoping review. *Int Perspect Sex Reprod Health*. 2019;45:71-85. doi:10.1363/45e8119
- 551 9. Hampanda K, Pelowich K, Chi BH, et al. A Systematic Review of Behavioral Couples-Based Interventions Targeting Prevention of Mother-to-Child Transmission in Low- and Middle-Income Countries. *AIDS Behav*. 2022;26(2):443. doi:10.1007/S10461-021-03401-X
- 552 10. Engle PL, Breaux C. Fathers' Involvement with Children: Perspectives from Developing Countries. *Soc Policy Rep*. 1998;12(1):1-24. doi:10.1002/j.2379-3988.1998.tb00007.x
- 553 11. Garcia M, Pence A, Evans JL. *Africa's Future, Africa's Challenge Early Childhood Care and Development in Sub-Saharan Africa Human Development*.; 2008.
- 554 12. Colvin CJ. Gender, Health and Change in South Africa: Three Ways of Working with Men and Boys for Gender Justice. *Rech Sociol Anthropol RS A*. 2017;48(1):109.
- 555 13. Ditekemena J, Koole O, Engmann C, et al. Determinants of male involvement in maternal and child health services in sub-Saharan Africa: a review. *Reprod Health*. 2012;9(1):32. doi:10.1186/1742-4755-9-32
- 556 14. Iliyasu Z, Galadanci HS, Muhammad B, et al. Correlates of HIV-Positive Fathers' Involvement in Prevention of Mother-to-child Transmission Programs in Northern Nigeria. *Curr HIV Res*. 2020;18(6):443-457. doi:10.2174/1570162X18666200810133347
- 557 15. M'baya Kansinjiro B, Nyondo-Mipando AL. A qualitative exploration of roles and expectations of male partners from PMTCT services in rural Malawi. *BMC Public Health*. 2021;21(1). doi:10.1186/S12889-021-10640-Z
- 558 16. Britto PR, Lye SJ, Proulx K, et al. Nurturing care: promoting early childhood development. *Lancet*. 2017;389(10064):91-102. doi:10.1016/S0140-6736(16)31390-3

- 1  
2  
3 587 17. Dovel K, Kalande P, Udedi E, et al. Integrated early childhood development services  
4 588 improve mothers' experiences with prevention of mother to child transmission (PMTCT)  
5 589 programs in Malawi: a qualitative study. *BMC Health Serv Res.* 2021;21(1).  
6 590 doi:10.1186/S12913-021-06342-2
- 7  
8 591 18. WHO | Care for child development: improving the care for young children. *WHO.* 2019.
- 9 592 19. Cataldo F, Sam-Agudu NA, Phiri S, Shumba B, Cornelius LJ, Foster G. The roles of  
10 593 expert mothers engaged in prevention of mother-to-child transmission (PMTCT)  
11 594 programs: A commentary on the INSPIRE studies in Malawi, Nigeria, and Zimbabwe. *J*  
12 595 *Acquir Immune Defic Syndr.* 2017;75:S224-S232. doi:10.1097/QAI.0000000000001375
- 13 596 20. Strauss, Anselm and Juliet Corbin. *Basics of Qualitative Research: Grounded Theory*  
14 597 *Procedures and Techniques.* Newbury Park, CA: Sage Publications, 1990.
- 15 598 21. Betancourt TS, Abrams EJ, McBain R, Fawzi MCS. Family-centred approaches to the  
16 599 prevention of mother to child transmission of HIV. *J Int AIDS Soc.* 2010;13 Suppl 2(Suppl  
17 600 2). doi:10.1186/1758-2652-13-S2-S2
- 18 601 22. Redinger S, Udedi E, Richter LM, et al. Double benefit? Integrating an early childhood  
19 602 development programme into HIV PMTCT Option B+ services in Malawi. *AIDS Care.*  
20 603 2021;33(12):1595-1602. doi:10.1080/09540121.2021.1876834
- 21 604 23. Theuring S, Mbezi P, Luvanda H, Jordan-Harder B, Kunz A, Harms G. Male involvement  
22 605 in PMTCT services in Mbeya Region, Tanzania. *AIDS Behav.* 2009;13(SUPPL. 1):92-  
23 606 102. doi:10.1007/s10461-009-9543-0
- 24 607 24. Comrie-Thomson L, Mavhu W, Makungu C, et al. Male involvement interventions and  
25 608 improved couples' emotional relationships in Tanzania and Zimbabwe: 'When we are  
26 609 walking together, I feel happy.' *Cult Health Sex.* August 2019:1-18.  
27 610 doi:10.1080/13691058.2019.1630564
- 28 611 25. Cunningham SA, Elo IT, Herbst K, Hosegood V. Prenatal development in rural South  
29 612 Africa: relationship between birth weight and access to fathers and grandparents. *Popul*  
30 613 *Stud (NY).* 2010;64(3):229-246. doi:10.1080/00324728.2010.510201
- 31 614 26. Montgomery CM, Hosegood V, Busza J, Timaeus IM. Men's involvement in the South  
32 615 African family: engendering change in the AIDS era. *Soc Sci Med.* 2006;62(10):2411-  
33 616 2419. doi:10.1016/J.SOCSCIMED.2005.10.026
- 34 617 27. Aluisio AR, Bosire R, Bourke B, et al. Male partner participation in antenatal clinic  
35 618 services is associated with improved HIV-free survival among infants in Nairobi, Kenya:  
36 619 A prospective cohort study. *J Acquir Immune Defic Syndr.* 2016;73(2):169-176.  
37 620 doi:10.1097/QAI.0000000000001038
- 38 621 28. Sifunda S, Peltzer K, Rodriguez VJ, et al. Impact of male partner involvement on mother-  
39 622 to-child transmission of HIV and HIV-free survival among HIV-exposed infants in rural  
40 623 South Africa: Results from a two phase randomised controlled trial. Price MA, ed. *PLoS*  
41 624 *One.* 2019;14(6):e0217467. doi:10.1371/journal.pone.0217467
- 42 625 29. Manda-Taylor L, Mwale D, Phiri T, et al. Changing times? Gender roles and relationships  
43 626 in maternal, newborn and child health in Malawi. *BMC Pregnancy Childbirth.*  
44 627 2017;17(1):321. doi:10.1186/s12884-017-1523-1
- 45 628 30. Morfaw F, Mbuagbaw L, Thabane L, et al. Male involvement in prevention programs of  
46 629 mother to child transmission of HIV: a systematic review to identify barriers and  
47 630 facilitators. *Syst Rev.* 2013;2(1):5. doi:10.1186/2046-4053-2-5
- 48 631 31. Matenga TFL, Zulu JM, Nkwemu S, Shankalala P, Hampanda K. Men's perceptions of  
49 632 sexual and reproductive health education within the context of pregnancy and HIV in  
50  
51  
52  
53  
54  
55  
56  
57  
58  
59  
60

- 1  
2  
3 633 Zambia: a descriptive qualitative analysis. *BMC Public Health*. 2021;21(1).  
4 634 doi:10.1186/S12889-021-11430-3  
5 635 32. Clark J, Sweet L, Nyoni S, Ward PR. Improving male involvement in antenatal care in  
6 636 low and middle-income countries to prevent mother to child transmission of HIV: A  
7 637 realist review. *PLoS One*. 2020;15(10). doi:10.1371/JOURNAL.PONE.0240087  
8 638 33. Aliyu MH, Blevins M, Audet CM, et al. Integrated prevention of mother-to-child HIV  
9 639 transmission services, antiretroviral therapy initiation, and maternal and infant retention in  
10 640 care in rural north-central Nigeria: A cluster-randomised controlled trial. *Lancet HIV*.  
11 641 2016;3(5):e202-e211. doi:10.1016/S2352-3018(16)00018-7  
12 642 34. Audet CM, Blevins M, Chire YM, et al. Engagement of Men in Antenatal Care Services:  
13 643 Increased HIV Testing and Treatment Uptake in a Community Participatory Action  
14 644 Program in Mozambique. *AIDS Behav*. 2016;20(9):2090-2100. doi:10.1007/s10461-016-  
15 645 1341-x  
16 646 35. Jensen SK, Placencio-Castro M, Murray SM, et al. Effect of a home-visiting parenting  
17 647 program to promote early childhood development and prevent violence: a cluster-  
18 648 randomized trial in Rwanda. *BMJ Glob Heal*. 2021;6(1). doi:10.1136/BMJGH-2020-  
19 649 003508  
20 650 36. Takah NF, Kennedy ITR, Johnman C. The impact of approaches in improving male  
21 651 partner involvement in the prevention of mother-to-child transmission of HIV on the  
22 652 uptake of maternal antiretroviral therapy among HIV-seropositive pregnant women in sub-  
23 653 Saharan Africa: A systematic review and meta-analysis. *BMJ Open*. 2017;7(11):e018207.  
24 654 doi:10.1136/bmjopen-2017-018207  
25  
26  
27  
28  
29  
30  
31  
32  
33  
34  
35  
36  
37  
38  
39  
40  
41  
42  
43  
44  
45  
46  
47  
48  
49  
50  
51  
52  
53  
54  
55  
56  
57  
58  
59  
60



| No. | Topic                                                                                        | Title and abstract | BMJ Open                       | Page 20 of 19                                                                                                                                                                                                                                                                                                                                    |
|-----|----------------------------------------------------------------------------------------------|--------------------|--------------------------------|--------------------------------------------------------------------------------------------------------------------------------------------------------------------------------------------------------------------------------------------------------------------------------------------------------------------------------------------------|
| S1  | Title                                                                                        |                    | Lines 1-3                      | Concise description of the nature and topic of the study identifying the study as qualitative or indicating the approach (e.g., ethnography, grounded theory) or data collection methods (e.g., interview, focus group) is recommended                                                                                                           |
| S2  | Abstract                                                                                     |                    | Lines 20-54                    | Summary of key elements of the study using the abstract format of the intended publication; typically includes background, purpose, methods, results, and conclusions                                                                                                                                                                            |
| 1   |                                                                                              |                    |                                |                                                                                                                                                                                                                                                                                                                                                  |
| 2   | <b>Introduction</b>                                                                          |                    |                                |                                                                                                                                                                                                                                                                                                                                                  |
| S3  | Problem formulation                                                                          |                    | Lines 82-133                   | Description and significance of the problem/phenomenon studied; review of relevant theory and empirical work; problem statement                                                                                                                                                                                                                  |
| 3   |                                                                                              |                    |                                |                                                                                                                                                                                                                                                                                                                                                  |
| S4  | Purpose or research question                                                                 |                    | Lines 135-141                  | Purpose of the study and specific objectives or questions                                                                                                                                                                                                                                                                                        |
| 4   | <b>Methods</b>                                                                               |                    |                                |                                                                                                                                                                                                                                                                                                                                                  |
| S5  | Qualitative approach and research paradigm                                                   |                    | Lines 173-181                  | Qualitative approach (e.g., ethnography, grounded theory, case study, phenomenology, narrative research) and guiding theory if appropriate; identifying the research paradigm (e.g., postpositivist, constructivist/interpretivist) is also recommended; rationale <sup>a</sup>                                                                  |
| 5   |                                                                                              |                    |                                |                                                                                                                                                                                                                                                                                                                                                  |
| S6  | Researcher characteristics and reflexivity                                                   |                    | Line 208<br>Lines 224-226      | Researchers' characteristics that may influence the research, including personal attributes, qualifications/experience, relationship with participants, assumptions, and/or presuppositions; potential or actual interaction between researchers' characteristics and the research questions; approach, methods, results, and/or transferability |
| 6   |                                                                                              |                    |                                |                                                                                                                                                                                                                                                                                                                                                  |
| 7   |                                                                                              |                    |                                |                                                                                                                                                                                                                                                                                                                                                  |
| 8   |                                                                                              |                    |                                |                                                                                                                                                                                                                                                                                                                                                  |
| S7  | Context                                                                                      |                    | Lines 148-171                  | Setting/site and salient contextual factors; rationale <sup>b</sup>                                                                                                                                                                                                                                                                              |
| 9   |                                                                                              |                    |                                |                                                                                                                                                                                                                                                                                                                                                  |
| S8  | Sampling strategy                                                                            |                    | Lines 183-191<br>Line 207      | How and why research participants, documents, or events were selected; criteria for deciding when no further sampling was necessary (e.g., sampling saturation); rationale <sup>b</sup>                                                                                                                                                          |
| 10  |                                                                                              |                    |                                |                                                                                                                                                                                                                                                                                                                                                  |
| S9  | Ethical issues pertaining to human subjects                                                  |                    | Lines 190-191<br>Lines 236-239 | Documentation of approval by an appropriate ethics review board and participant consent, or explanation for lack thereof; other confidentiality and data security issues                                                                                                                                                                         |
| 11  |                                                                                              |                    |                                |                                                                                                                                                                                                                                                                                                                                                  |
| 12  |                                                                                              |                    |                                |                                                                                                                                                                                                                                                                                                                                                  |
| S10 | Data collection methods                                                                      |                    | Lines 204-211                  | Types of data collected; details of data collection procedures including (as appropriate) start and stop dates of data collection and analysis, iterative process, triangulation of sources/methods, and modification of procedures in response to evolving study findings; rationale <sup>b</sup>                                               |
| 13  |                                                                                              |                    |                                |                                                                                                                                                                                                                                                                                                                                                  |
| 14  |                                                                                              |                    |                                |                                                                                                                                                                                                                                                                                                                                                  |
| S11 | Data collection instruments and technologies                                                 |                    | Lines 193-202                  | Description of instruments (e.g., interview guides, questionnaires) and devices (e.g., audio recorders) used for data collection; if/how the instrument(s) changed over the course of the study                                                                                                                                                  |
| 15  |                                                                                              |                    |                                |                                                                                                                                                                                                                                                                                                                                                  |
| S12 | Units of study                                                                               |                    | Lines 242-252<br>Table 1       | Number and relevant characteristics of participants, documents, or events included in the study; level of participation (could be reported in results)                                                                                                                                                                                           |
| 16  |                                                                                              |                    |                                |                                                                                                                                                                                                                                                                                                                                                  |
| S13 | Data processing                                                                              |                    | Lines 205-214                  | Methods for processing data prior to and during analysis, including transcription, data entry, data management and security, verification of data integrity, data coding, and anonymization/deidentification of excerpts                                                                                                                         |
| 17  |                                                                                              |                    |                                |                                                                                                                                                                                                                                                                                                                                                  |
| 18  |                                                                                              |                    |                                |                                                                                                                                                                                                                                                                                                                                                  |
| S14 | Data analysis                                                                                |                    | Lines 213-230                  | Process by which inferences, themes, etc., were identified and developed, including the researchers involved in data analysis; usually references a specific paradigm or approach; rationale <sup>b</sup>                                                                                                                                        |
| 19  |                                                                                              |                    |                                |                                                                                                                                                                                                                                                                                                                                                  |
| 20  |                                                                                              |                    |                                |                                                                                                                                                                                                                                                                                                                                                  |
| S15 | Techniques to enhance trustworthiness                                                        |                    | Lines 218-230                  | Techniques to enhance trustworthiness and credibility of data analysis (e.g., member checking, audit trail, triangulation); rationale <sup>b</sup>                                                                                                                                                                                               |
| 21  |                                                                                              |                    |                                |                                                                                                                                                                                                                                                                                                                                                  |
| 22  | <b>Results/findings</b>                                                                      |                    |                                |                                                                                                                                                                                                                                                                                                                                                  |
| S16 | Synthesis and interpretation                                                                 |                    | Lines 242-395                  | Main findings (e.g., interpretations, inferences, and themes); might include development of a theory or model, or integration with prior research or theory                                                                                                                                                                                      |
| 23  |                                                                                              |                    |                                |                                                                                                                                                                                                                                                                                                                                                  |
| S17 | Links to empirical data                                                                      |                    | Lines 242-395                  | Evidence (e.g., quotes, field notes, text excerpts, photographs) to substantiate analytic findings                                                                                                                                                                                                                                               |
| 24  |                                                                                              |                    |                                |                                                                                                                                                                                                                                                                                                                                                  |
| 25  | <b>Discussion</b>                                                                            |                    |                                |                                                                                                                                                                                                                                                                                                                                                  |
| S18 | Integration with prior work, implications, transferability, and contribution(s) to the field |                    | Lines 414-502                  | Short summary of main findings; explanation of how findings and conclusions connect to, support, elaborate on, or challenge conclusions of earlier scholarship; discussion of scope of application/generalizability; identification of unique contribution(s) to scholarship in a discipline or field                                            |
| 26  |                                                                                              |                    |                                |                                                                                                                                                                                                                                                                                                                                                  |
| 27  |                                                                                              |                    |                                |                                                                                                                                                                                                                                                                                                                                                  |
| S19 | Limitations                                                                                  |                    | Lines 504-515                  | Trustworthiness and limitations of findings                                                                                                                                                                                                                                                                                                      |
| 28  | <b>Other</b>                                                                                 |                    |                                |                                                                                                                                                                                                                                                                                                                                                  |
| S20 | Conflicts of interest                                                                        |                    | Lines 546-547                  | Potential sources of influence or perceived influence on study conduct and conclusions; how these were managed                                                                                                                                                                                                                                   |
| 29  |                                                                                              |                    |                                |                                                                                                                                                                                                                                                                                                                                                  |
| S21 | Funding                                                                                      |                    | Lines 549-555                  | Sources of funding and other support; role of funders in data collection, interpretation, and reporting                                                                                                                                                                                                                                          |
| 30  |                                                                                              |                    |                                |                                                                                                                                                                                                                                                                                                                                                  |
| 31  |                                                                                              |                    |                                |                                                                                                                                                                                                                                                                                                                                                  |

The SRQR was created by searching the literature to identify guidelines, reporting standards, and other empirical information on qualitative research, including the role of experts in training and consulting experts to gain feedback. The SRQR aims to improve the transparency of all aspects of qualitative research by providing clear standards for reporting qualitative research.

The rationale should briefly discuss the justification for choosing that theory, approach, method, or technique rather than other options available, the assumptions and limitations implicit in those choices, and how those choices influence study conclusions and transferability. As appropriate, the rationale for several items might be assessed together.
